# Between fishing and farming: palaeogenomic analyses reveal cross-cultural interactions triggered by the arrival of the Neolithic in the Danube Gorges

Zuzana Hofmanová<sup>1,2,3,4,5,28</sup>, Carlos S. Reyna-Blanco<sup>1,2,28</sup>, Camille de Becdelièvre<sup>6</sup>, Ilektra Schulz<sup>1,2,5</sup>, Jens Blöcher<sup>5</sup>, Jelena Jovanović<sup>7</sup>, Laura Winkelbach<sup>5</sup>, Sylwia M. Figarska<sup>5</sup>, Anna Schulz<sup>8</sup>, Marko Porčić<sup>7,9</sup>, Petr Květina<sup>10</sup>, Alexandros Tsoupas<sup>11</sup>, Mathias Currat<sup>11,12</sup>, Alexandra Buzhilova<sup>13,14</sup>, Fokke Gerritsen<sup>15</sup>, Necmi Karul<sup>16</sup>, George McGlynn<sup>17</sup>, Jörg Orschiedt<sup>18,19</sup>, Rana Özbal<sup>20</sup>, Joris Peters<sup>17,21</sup>, Bogdan Ridush<sup>22</sup>, Thomas Terberger<sup>23</sup>, Maria Teschler-Nicola<sup>24,25</sup>, Gunita Zariņa<sup>26</sup>, Andrea Zeeb-Lanz<sup>27</sup>, Sofija Stefanović<sup>9</sup>, Joachim Burger<sup>5,29\*</sup>, Daniel Wegmann<sup>1,2,29\*</sup>

## Affiliations:

<sup>1</sup>Department of Biology, University of Fribourg; 1700 Fribourg, Switzerland.

<sup>2</sup>Swiss Institute of Bioinformatics; 1015 Lausanne, Switzerland.

<sup>3</sup>Max Planck Institute for Evolutionary Anthropology; 04103 Leipzig, Germany.

<sup>4</sup>Department of Archaeology and Museology, Faculty of Arts, Masaryk University; 60177 Brno, Czech Republic.

<sup>5</sup>Palaeogenetics Group, Institute of Organismic and Molecular Evolution (iomE), Johannes Gutenberg University Mainz; 55099 Mainz, Germany.

<sup>6</sup>Aix-Marseille University, CNRS, EFS, ADES, Marseille, France.

<sup>7</sup>BioSense Institute, University of Novi Sad, Bulevar Zorana Đinđića 1; 21000 Novi Sad, Serbia.

<sup>8</sup>Centre for the Study of Manuscript Cultures, Cluster of Excellence Understanding Written Artefacts, Hamburg University; 20354 Hamburg, Germany.

<sup>9</sup>Laboratory for Bioarchaeology, Department of Archaeology, Faculty of Philosophy, University of Belgrade; Čika Ljubina 18-20, 11000 Belgrade, Serbia.

<sup>10</sup>Institute of Archaeology of the Czech Academy of Sciences; Prague, Czechia.

<sup>11</sup>Laboratory of Anthropology, Genetics and Peopling History, Department of Genetics and Evolution - Anthropology Unit, University of Geneva; Quai Ernest-Ansermet 30, 1205 Geneva, Switzerland

<sup>12</sup>Institute of Genetics and Genomics in Geneva (IGE3), University of Geneva Medical Centre (CMU); 1 rue Michel-Servet, 1211 Geneva, Switzerland

<sup>13</sup>Research Institute and Museum of Anthropology at Moscow State University; Mokhovaya Street 11, 125009 Moscow, Russia.

<sup>14</sup>Institute of Archaeology and Ethnography; Prospekt Lavrentieva 17, 630090 Novosibirsk, Russia.

<sup>15</sup>Netherlands Institute in Turkey; İstiklal Caddesi 181, Merkez Han, 34433 Beyoğlu/Istanbul, Turkey.

<sup>16</sup>Department of Prehistory, İstanbul University; 34434 İstanbul, Turkey

<sup>17</sup>SNSB, State Collection for Anthropology and Palaeoanatomy; Karolinenplatz 2a, 80333 Munich, Germany.

<sup>18</sup>Institut für Prähistorische Archäologie, Freie Universität Berlin, Fabeckstr. 23-25; 14195 Berlin, Germany.

<sup>19</sup>Landesamt für Denkmalpflege und Archäologie Sachsen-Anhalt, Richard-Wagner-Straße 9; 06114 Halle (Saale), Germany.

<sup>20</sup>Department of Archaeology and History of Art, Koc, University; 34450 İstanbul, Turkey.

<sup>21</sup>Institute of Palaeoanatomy, Domestication Research and the History of Veterinary Medicine, LMU Munich; 80539 Munich, Germany.

<sup>22</sup>Department of Physical Geography, Geomorphology and Paleogeography, Yuriy Fedkovych Chernivtsi National University; Kotsubynskogo 2, 58012 Chernivtsi, Ukraine.

<sup>23</sup>Seminar for Pre- and Protohistory, University of Göttingen, Nikolausberger Weg 15, 37073 Göttingen, Germany.

<sup>24</sup>Department of Anthropology, Natural History Museum of Vienna; 1010 Vienna, Austria.

<sup>25</sup>Department of Evolutionary Anthropology, University of Vienna; 1030 Vienna, Austria.

<sup>26</sup>Institute of History, University of Latvia, Riga, Latvia.

<sup>27</sup>Generaldirektion Kulturelles Erbe Rheinland-Pfalz; 67346 Speyer, Germany.

<sup>28</sup>These authors contributed equally.

<sup>29</sup>Senior authors.

\*Corresponding authors: [daniel.wegmann@unifr.ch](mailto:daniel.wegmann@unifr.ch); [jburger@uni-mainz.de](mailto:jburger@uni-mainz.de); [zuzana\\_hofmanova@eva.mpg.de](mailto:zuzana_hofmanova@eva.mpg.de)

## Summary

While early Neolithic populations in Europe were largely descended from early Aegean farmers, there is also evidence of episodic gene flow from local Mesolithic hunter-gatherers into early Neolithic communities. Exactly how and where this occurred is still unknown. Here we report direct evidence for admixture between the two groups at the Danube Gorges in Serbia. Analysis of palaeogenomes recovered from skeletons revealed that second-generation mixed individuals were buried amidst individuals whose ancestry was either exclusively Aegean Neolithic or exclusively local Mesolithic. The mixed ancestry is also reflected in a corresponding mosaic of grave goods. With its deep sequence of occupation and its unique dwellings that suggest at least semi-sedentary occupation since the late Mesolithic, the area of the Danube Gorges has been at the center of the debate about the contribution of Mesolithic societies to the Neolithisation of Europe. As suggested by our data, which were processed exclusively with uncertainty-aware bioinformatic tools, it may have been precisely in such contexts that close interactions between these societies were established, and Mesolithic ancestry and cultural elements were assimilated.

## Introduction

The Danube Gorges area, or Đerdap in Serbian, is situated in the Central Balkans and an early contact zone between migrating early European farmers and local foragers (Oross and Bánffy, 2009). With more than 25 prehistoric sites (Fig. 1), numerous Mesolithic and Neolithic human burial finds and a deep Final Paleolithic to Neolithic sequence of occupation it has contributed significantly to our understanding of the introduction of agriculture to the European continent and Mesolithic-Neolithic interactions (Porčić, Blagojević and Stefanović, 2016; de Bechedelievre *et al.*, 2020).

After a Final Paleolithic occupation in some rock-shelter sites (ca. 13,000-9,500 cal BC), the human presence at the Danube Gorges is documented on open-air sites in river terraces at several locations, such as Lepenski Vir and Padina during the Early Mesolithic period (ca. 9,500-7,400/7,300 cal BC; (Boroneanț, 1999; Borić, 2011)). The population then likely became more numerous during the Late Mesolithic period (ca. 7400/7300-6300/6200 cal BC), and some finds indicate that the Mesolithic population lived partly semi-sedentary lives and their mobility was greatly reduced compared to earlier periods (Dimitrijević, Živaljević and Stefanović, 2016; de Bechedelievre *et al.*, 2021). This semi-sedentary lifestyle was undoubtedly associated with the

consumption of aquatic food: the community relied heavily on fishing and benefited especially from the large numbers of anadromous species that populated the narrow gorge during their upward migration (Bonsall *et al.*, 1997; Bartosiewicz *et al.*, 2001; Nehlich *et al.*, 2010; Borić *et al.*, 2014; Jovanović *et al.*, 2019). The diet was further enriched by game, different plant species, and possibly dogs (Cristiani *et al.*, 2016; Jovanović *et al.*, 2019, 2021).

At the end of the 7th millennium BC, the first settlements with farming subsistence appeared in the Central Balkans and the southern part of the Pannonian plain: the Neolithic Starčevo-Körös-Criş cultural complex (Garašanin, 1982; Tringham, 2000; Krauß, 2011), which later developed important sites, such as Starčevo and the early layers of Vinča tell, in the immediate vicinity of the Danube Gorges (Porčić, Blagojević and Stefanović, 2016; Jovanović *et al.*, 2019; de Beccdelièvre *et al.*, 2020; Porčić *et al.*, 2020, 2021). Around this time, trapezoidal houses were built at the Lepenski Vir site. Such houses, while similar to Late Mesolithic dwellings at the nearby site Vlasac, have a shape not known outside the Danube Gorges (Boric, French and Dimitrijević, 2008), but might have some structural analogies, such as plastered floors, in Neolithic Anatolia (Srejović, 1969; Borić, 2011; Borić, Radović and Stefanović, 2012). Mesolithic foragers and newcomers with a Neolithic background used the settlement site during this period simultaneously (Borić and Price, 2013; Hofmanová, 2016; González-Fortes *et al.*, 2017; Mathieson *et al.*, 2018) and, as indicated by isotopic data in skeletons from the time of their arrival, newcomers had a more terrestrial diet (Borić and Price, 2013). This period of interaction between foragers and farmers at the site is referred to as the "Transformation Phase" and dates ca 6200-5950 cal BC (Borić *et al.*, 2018). Besides the trapezoidal houses, other elements of the Neolithic way of life, such as typical ornaments, raw materials and ceramics, now appear (Garašanin and Radovanović, 2001). In addition, so-called ancestor statues with fish-like features have been found in the corresponding layers of Lepenski Vir. Over time, Neolithic features increased at the site, leading to the fully developed Neolithic period (5,950-5,550 cal BC), in which the trapezoidal houses were abandoned (citation), the Neolithic suite of domesticated animals appeared (Boric and Dimitrijevic, 2005; Borić and Dimitrijević, 2007) and grains of cereals have been evidenced in the dental calculus of some Neolithic individuals (Jovanović *et al.*, 2021). However, the use of wild resources remained dominant (Boric and Dimitrijevic, 2005; Borić and Dimitrijević, 2007; Cramp *et al.*, 2019; Jovanović *et al.*, 2019).

This wealth of evidence makes Lepenski Vir one of the best-studied sites of the Mesolithic-Neolithic transition and provides a unique opportunity to explore foragers and farmers interactions. However, key aspects of the site's population history remain unclear, including how the mixing between the Danubian and Aegean Neolithic members of the society took place, i.e. when and with what proportions of the two populations it took place. Furthermore, it is not known how these findings from the Danubian Gorges relate to other forager or farming populations in SW Asia and Europe.

Using uncertainty-aware bioinformatic tools on high quality genomic data from 51 available and 50 newly produced samples with a geographical and chronological focus on the Meso-Neolithic transition in the Danube Gorges and key sites from the Central Balkans, Lower Austria, Southern Germany, the Marmara region and the Baltics, we show that the two contributing populations were genetically well differentiated but episodically interacted, as evidenced not least by the presence of first generation mixed individuals.

## Results

In order to better understand the reciprocal relationship between the populations originating from the Neolithic area in the wider Aegean including the Sea of Marmara and the indigenous foragers in Serbia, we produced (Table 1): 1) six whole genomes at a sequencing depth of 1-5X and ten neutralomes of 5Mb length (see Methods) from the Danube Gorges, 2) ten Neolithic neutralomes from the Aegean/Marmara region 3) 37 neutralomes from Neolithic Central Europe, 4) five neutralomes from Mesolithic Central Europe, 6) 12 neutralomes from hunter-gatherers of North-Eastern Europe, 7) one neutralome from Lesnik Cave presumably dating to the Final Paleolithic, and 8) 78 mtDNA genomes from the same regions (Supplementary Data Table 1). We complemented these with 53 chronologically similar whole genomes available from Europe, NW and Central Anatolia and the Caucasus ((Gamba *et al.*, 2014; Lazaridis *et al.*, 2014; Olalde *et al.*, 2014, 2015; Skoglund *et al.*, 2014; Jones *et al.*, 2015, 2017; Broushaki *et al.*, 2016; Hofmanová *et al.*, 2016; Kılınç *et al.*, 2016; González-Fortes *et al.*, 2017; Sikora *et al.*, 2017; Günther *et al.*, 2018; Marchi *et al.*, 2022), Table S1), including four from the Danube Gorges ((Marchi *et al.*, 2022), Table 1), and 20 modern samples from Africa and West Eurasia retrieved from the SGDP database ((Mallick *et al.*, 2016), Table S1).

To ensure comparability and increase the sensitivity of population genomic analyses, we focused on 54 whole genomes and 54 5Mb neutralomes (with seven overlaps, Table 1, S1) that passed rigorous quality assessments mainly evaluating the reproducibility of genetic diversity estimates in face of data bootstrapping (see Methods, Figure S1-S2). Further, we based our analyses on uncertainty-aware inference methods that use genotype likelihoods, which were inferred from raw sequence data (unless not publicly available) using a bioinformatic pipeline dedicated to ancient DNA (see Methods, Supplementary Data Table 1; (Link *et al.*, 2017)). Finally, we excluded an individual from Dillingen, Germany (Dil15), which we identified as a brother of Dil16, as well as one from Barcin, Turkey (Bar15), which we identified to have a parent-child relationship with Bar8 (Figure S2D).

### ***Early-generation admixed individuals at the Danube Gorges***

Two Danube Gorges individuals, LEPE18 (LV 27d, 6,126 ± 100 cal BC) and LEPE46 (LV 93, 6,120 ± 102 cal BC), display substantial ancestry from both clusters. To shed more light on their admixture status, we used a Bayesian approach (Shastri *et al.*, 2021) to infer genome-wide ancestry proportions ( $q_1$ ) jointly with inter-population ancestry proportions ( $Q_{12}$ ), i.e. the fraction of the genome at which a sample is heterozygous for the different ancestries (Fig 2D). These estimates indicate that both samples were second-generation admixed individuals: both had a mixed first-generation parent, while the other parent was unmixed of either Meso European-like (LEPE18) or Neo Aegean-like ancestry (LEPE46). Thus, LEPE46 had one Meso European-like and three Neo Aegean-like grandparents, while LEPE18 had one Neo Aegean-like and three Meso European-like grandparents.

We identified three additional individuals with considerable ancestry from both clusters: Bla32, Bla59 and Bla45 from the Blätterhöhle cave in Westfalia, Germany (Fig. 2A) dating to 4th millennium cal BC (3900-3000 cal BC). In contrast to LEPE18 and LEPE46, they appear to be later generation admixed (Fig. 2D), in line with their more recent age (see Table 1) and the previously reported ongoing admixture at this site (Bollongino *et al.*, 2013; Lipson *et al.*, 2017) and in the wider region (Haak *et al.*, 2015).

### ***High genetic diversity in Danube Gorges foragers***

To characterize the forager population present at the Danube Gorges during the Mesolithic and the Transformation phase, we first focused on individuals with <4% Neo Aegean-like ancestry in

the admixture analysis. As attested by a projection-free PCA (Figure 2B), the Meso European-like individuals from the Danube Gorges are most similar to those from Western Europe, albeit slightly shifted towards individuals from North-Eastern Europe, in line with previous reports (Mathieson *et al.*, 2018). In contrast to the Western European individuals, their cluster appears rather diverse (Figure 2B), which likely reflects a locally large population, elevated gene flow from neighboring populations, or both. This interpretation, consistent with the idea of a partially sedentary and prosperous fishing society of the Transformation period, is corroborated by Danube Gorges individuals generally having the highest genome-wide heterozygosity levels and shortest total lengths of runs of homozygosity (ROH) among all post-LGM Meso European-like individuals (Figure 3A, B, E), albeit some individual variation. Interestingly, the three Danube Gorges individuals from the Vlasac site that fall most distantly from the other Western European Meso European-like samples on the PCA (Fig 2A, B, Figure S3B, VLASA10, VLASA32, VLASA41) were among the only four buried with disarticulated skulls.

A similarly diverse cluster is observed for the individuals of the site of Zvejnieki, with the two older samples ZVEJ25 (grave 93,  $5,738 \pm 102$  cal BC) and ZVEJ162 (grave ZV162,  $4,470 \pm 72$  cal BC) clustering with Meso European-like samples from Western Europe, while the youngest sample ZVEJ317 (grave ZV317,  $3,890 \pm 67$  cal BC) does not (Figure 2B). The influx of a rather distinct ancestry into Zvejnieki during the Neolithic has been previously reported (Jones *et al.*, 2017). As our data shows, the source of the influx was genetically very close to samples from Minino, which lies around 1,600 km to the east. Since the Baltic Sea region was covered with ice until at least the late 10th millennium cal BC, it is reasonable to assume that the two distinct ancestors discovered at Zvejnieki ultimately came from two different glacial refugia of the late Ice Age, possibly one in southern France and one on the Black Sea coast (Mittnik *et al.*, 2018). Despite this diverse origins, we estimate low levels of heterozygosity for all Zvejnieki and Minino samples but no evidence of recent inbreeding for ZVEJ25 (the only sample with sufficient quality whole genome data).

Noteworthy, we estimated the lowest heterozygosity among all Neolithomes for the late hunter-gatherer from the site Criewen (GR2, (Terberger *et al.*, 2018)), a female from Northern-Eastern Germany, with a date around 4,500 cal BC (dated to  $4,600 \pm 60$  cal BC but likely with reservoir effect). It represents the most recent Central European individual with essentially 100% Meso European-like ancestry analyzed here.

### ***Neolithic ancestry in Lepenski Vir resembles that from Early Neolithic Northern-Greece***

To characterize the Neolithic population appearing at the Danube Gorges around 6,200 cal BC, we next focused on all samples with >96% Neo Aegean-like ancestry in the Admixture analysis. On a projection-free PCA (Figure 2C, Figure S3A), the first axis separates Neo Aegean-like samples of the Marmara region (Aktopraklık and Barcin sites) from those of Greece and Central Europe, a distinction usually not seen on projected PCAs (e.g. (Mathieson *et al.*, 2018)). The three Neo Aegean-like individuals from Lepenski Vir as well as Greek individuals from the same time (Nea2, Nea3) fall closest to those from Marmara, unlike the Greek individuals from later periods (Pal7, Klei10). The same chronological signal is also seen among the Lepenski Vir individuals, among which the two from the Transformation Period, LEPE48 (LV 122,  $5,939.5 \pm 72.5$  cal BC) and LEPE39 (LV 82,  $6,075 \pm 125$  cal BC) appear closer to Marmara samples than LEPE52 (LV 73,  $5,812 \pm 119$  cal BC), the sample from the later period of the fully developed Neolithic. This could suggest extended gene flow with other Neolithic sites in the later phases of Lepenski Vir, which would also explain the observed shift in the composition of the mtDNA gene pool towards those sites over time (Supplementary Data Table 1). However, as far as the further Neolithic expansion along the Balkan route from the Aegean to Central Europe is concerned, the PCA does not show a clear spatiotemporal signal of differentiation. This also applies to the individuals from Asparn Schletz and Herxheim, which are thought to derive from a massacre or ritual background potentially involving individuals from a larger area (Boulestin *et al.*, 2009; Orschiedt and Haidle, 2012; Schulting and Fibiger, 2012; Boulestin, 2015). At the level of genomic depth studied here, they do not appear particularly diverse, comparable to the individuals from more regular Neolithic burial sites such as Kleinhadersdorf.

### ***Heterozygosity is higher in farmers than in foragers and decreases along the Neolithic route of expansion***

With the exception of a single individual from the Herxheim site in SW-Germany (grave 281-19-6,  $5,078 \pm 85$ ), the genome-wide heterozygosity estimated from neutralomes for all Neo Aegean-like individuals was consistently higher than for post-LGM Meso European-like individuals, both overall as well as when comparing samples from the Danube Gorges only (Fig 3A). In line with the idea of the Neolithic expansion along a Balkan route, we found generally the highest diversity both in terms of differentiation on the PCA (Figure 2C) and heterozygosity

(Figure 3A,B) in the Marmara region (Aktopraklık and Barcın). While there is a general spatial trend of decreasing heterozygosity from the Marmara region towards SW Germany, there appears to be no temporal change in the Marmara region. Rather, the Chalcolithic sample AKT6 (grave H17/50.1;  $5,584 \pm 49$  cal BC), which dates  $\sim 1000$  years later, shows heterozygosity comparable to that of the Early Neolithic skeletons from the same region.

Consistent with their admixed status, the genome-wide heterozygosity of LEPE18 and LEPE46 was estimated above that of most Meso European-like and Neo Aegean-like samples, especially those from the Danube Gorges.

Heterozygosity estimates from whole genomes confirmed these general patterns, albeit the smaller sample size. The heterozygosity of Neo Aegean-like samples appears to match that of modern Europeans (Fig 3B), with the exception of Bar31, Klei10 and Pal7 that had slightly lower levels similar to that of WC1 from Wezmeh Cave, an Early Neolithic individual from Iran with a very different demographic history (Broushaki *et al.*, 2016; Marchi *et al.*, 2022). For Bon002, we inferred particularly low levels of heterozygosity, in line with previous reports (Kılınç *et al.*, 2016).

The lower heterozygosity of post-LGM foragers compared to Neolithic individuals was previously seen at larger geographic scales (Fu *et al.*, 2016; Kılınç *et al.*, 2016; Posth *et al.*, 2016; Kousathanas *et al.*, 2017; Renaud *et al.*, 2019) and interpreted as a result of their long-term demography, such as a severe bottleneck during the LGM and their generally low population size (Gamble *et al.*, 2004; Fernández-López de Pablo *et al.*, 2019; Marchi *et al.*, 2022). In support of a strong LGM bottleneck, we estimated elevated genome-wide diversity for the Meso European-like individuals from Sunghir predating the LGM (Sikora *et al.*, 2017). In support of low post-LGM population size, we found all Meso European-like individuals, including those from the Danube Gorges, to have longer total length of runs of homozygosity (ROH) than Neolithic samples (but not LEPE52, which was likely recently inbred) (Fig 3E). Despite their elevated diversity, however, the three pre-LGM Sunghir individuals had the longest total ROH and the highest number of very long ROH segments of all Meso European-like individuals, in line with the interpretation of very small populations embedded in larger mating networks (Sikora *et al.*, 2017). Interestingly, we estimated elevated diversity comparable to that of the Sunghir samples also for Lec2, an individual from Lesnik Cave with unclear dating but possible of pre-LGM origin.



### ***No evidence for strong purifying selection in the Neolithic population***

We next evaluated whether these demographic events led to a reduction in the efficacy of purifying selection by inferring the heterozygosity at exons relative to that at introns for each whole-genome sample (Fig 3C). As expected, we estimated lower diversity at exons than at introns for all individuals, but found this reduction was much more pronounced in modern than ancient individuals, which hints at increased purifying selection in recent times, probably as a result of population growth (Gazave *et al.*, 2013). However, we inferred similar diversity ratios and thus a similar degree of purifying selection for Meso European-like and Neo Aegean-like samples, albeit considerable individual variation. This suggests that the larger diversity seen among Neo Aegean-like samples is not simply the result of a larger effective population size, but rather of a particularly diverse source population, maybe as a result of past admixture (Marchi *et al.*, 2022).

### ***Low X/A diversity of a Mesolithic female***

To test for differences in sex-biased gene flow, we next compared the heterozygosity at neutral regions on the X chromosome and autosomes (X/A diversity) for all female individuals with whole-genome data (Fig 3D). Low X/A ratios may reflect demographic events such as recent bottlenecks or relatively low effective sizes for females compared to males (Pool and Nielsen, 2007; Amster and Sella, 2020; Amster *et al.*, 2020). The lowest diversity ratio inferred was for the Early Mesolithic individual LEPE51, the only Meso European-like female for which sufficient sequence data is currently available. Among modern samples, equally low ratios were found for two individuals from forager populations (KhomaniSan-1, Saami-1). For other modern and all Neo Aegean-like individuals we inferred higher ratios, albeit with substantial variation.

### ***Neolithic individuals (in the Danube Gorges) were smaller and tended to have lighter pigmentation than indigenous foragers.***

The genetic differences between local Mesolithic and incoming Neolithic populations at the Danube Gorges translated into observable phenotypic differences. Here, we focused on the four pigmentation phenotypes, *skin pigmentation*, *eye pigmentation*, *hair pigmentation* and *hair shade*, that we predicted using the HirisPlex-S system. Focusing on non-admixed Meso European-like and Neo Aegean-like individuals along the Danubian corridor, none of these phenotypes were significantly different between these groups. In combination, however, these

four pigmentation phenotypes were predictive of ancestry: using a linear discriminant analysis (LDA), we identified a combination of lighter skin pigmentation, bluer eyes, lighter hair pigmentation and lighter hair shade that predicted Neo Aegean-like ancestry for 30 (63%) of all 48 Neo Aegean-like individuals and two (40%) of the five admixed individuals with posterior probability > 0.75, while all 15 Meso European-like had posterior probabilities < 0.5 and nine (60%) even < 0.25 (Figure 4). The remaining 18 (37%) Neo Aegean-like individuals, however, appear to have had phenotypic combinations rather similar to Meso European-like individuals (i.e. darker pigmentation), as did the two second-generation admixed individuals from Lepenski Vir. Notably, Neo Aegean-like individuals from the Marmara region and Greece south of the Danube Gorges (the sites of Aktopraklık, Barcın, Nea Nikomedeia, Kleitos and Paliambela) were more easily distinguished from Meso European-like individuals (13/15 or 87%) than Neo Aegean-like individuals from the Danube Gorges or further north (17/33 or 52%,  $\chi^2=4.04$ ,  $p=0.044$ ). Nonetheless, more than half of all Neolithic immigrants could easily be told apart from local Mesolithic individuals just based on these four phenotypes, and likely even more based on the entire habitus.

A particular phenotype previously shown to differ between these groups, for instance, was a larger body size for Mesolithic than Neolithic individuals (Olalde *et al.*, 2014; Ju and Mathieson, 2021; Marchi *et al.*, 2022). Given the low number of Danube Gorges samples with reliable osteological estimates, evidence for differences in body size mostly stems from comparisons between periods, with Neolithic samples generally inferred as smaller than those from the Mesolithic period (Macintosh, Pinhasi and Stock, 2016; Jovanović, 2017; de Becdelièvre *et al.*, 2020). However, it is interesting to note that the anthropological sexing errors discovered through our genetic analysis almost exclusively involved relatively tall Meso European-like females interpreted as males and relatively short Neo Aegean-like males as females (Supplementary Data Table 1, (Borić and Price, 2013; Budd *et al.*, 2013; Roodenberg, Gerritsen and Özbal, 2013); personal communication).

## Discussion

### Genetic diversity in the Danube Gorges in a supra-regional context

On a projection-free PCA, Meso European-like individuals from the Danube Gorges spanning more than 1,500 years are well differentiated from other Meso European-like individuals, including those from Central Europe, North-Eastern Europe and the Black Sea region. This

differentiation was initially hypothesized to be the result of admixture with more eastern hunter-gatherers (Mathieson *et al.*, 2018; Feldman *et al.*, 2019). However, it can also be explained by bidirectional gene-flow between different hunter-gatherer groups (Feldman *et al.*, 2019), a hypothesis more in line with the deep split recently inferred between multiple hunter-gatherer individuals, including Meso European-like individuals from the Danube Gorges (Marchi *et al.*, 2022). According to this scenario, the foraging communities of Europe suffered from a major population reduction and diverged into several smaller groups during the LGM. Members of one of those groups settled in the Danube Gorges, where they developed a semi-sedentary lifestyle certainly as of the Late Mesolithic period (Dimitrijević, Živaljević and Stefanović, 2016; de Becdelièvre *et al.*, 2021). The level of gene flow with neighboring groups remains unknown. But the rather high pairwise diversity observed among the Danube Gorges individuals compared to, for instance, individuals from Central Europe, as well as the elevated heterozygosity of at least some Danube Gorges individuals is indicative of a relatively large and well connected population, an interpretation well in line with the richness of archaeological finds from this period (Borić and Stefanović, 2004; Borić *et al.*, 2014; Borić, 2016, 2021). The difference in diversity appears particularly stark when compared to the genomic data from Criewen (GR2), the most recently dated Central European individual with 100% Meso-European-like ancestry, or the Baltic site of Zvejnieki. In contrast to the site of Zvienjeki, however, we found no indication of an influx of Mesolithic individuals with very distinct ancestries at the Danube Gorges.

That changed towards the end of the 7th millennium BC when individuals with Neo Aegean-like ancestry appeared in the Danube Gorges. The Mesolithic and Neolithic sites in the Danube Gorges provide a unique opportunity to genetically study forager-farming interactions at high resolution and interpret them in a European context. Whether Lepenski Vir was a forager community attracting individuals from the farming frontier, or whether the site was possibly newly occupied around c. 6,200 BC by arriving migrants from the Aegean region attracting forager individuals, has been a long-standing archeological debate (Srejović, 1969; Garašanin and Radovanović, 2001; Borić and Price, 2013). Signals of admixture between individuals with Meso European-like and Neo Aegean-like ancestry have been reported previously for several other prehistoric sites, where the rate of forager introgression was found to have been very low initially but to have increased significantly over time (Lipson *et al.*, 2017). In contrast, evidence for farming individuals joining previously established forager societies remains rare (Bramanti *et*

*al.*, 2009; Bollongino *et al.*, 2013; Hofmanová, 2016; Hofmanová *et al.*, 2016; Mathieson *et al.*, 2018), but early farmers, who were adapting their subsistence to new environmental conditions, might have been attracted by forager communities that provided local knowledge and access to resources, such as the permanent abundance in fish species in the Gorges at the time of the 8.2 cal BC cooling event. For local foragers, in turn, the resulting mutualistic relationships allowed for the exchange of goods and an access to a wider mating network (Bocquet-Appel and Bar-Yosef, 2008).

### ***Admixed individuals were also admixed culturally***

This study brings evidence that admixture between individuals with Meso European-like and Neo Aegean-like ancestries certainly occurred before 6000 cal BC in the Central Balkans: the second-generation admixed individuals (male LEPE18, LV 27d; female LEPE46, LV 93), as well as the previously reported admixed case from Lepenski Vir (LEPI\_61, LV 61; (Mathieson *et al.*, 2018) were all dated to the period of Transformation (ca 6200-5950 cal BC). Although they were buried in extended supine position, following local foragers' funerary customs, various contextual and bioarchaeological evidence indicate that admixture may have locally triggered a complex pattern of cultural mixing. For instance, the admixed male child LV 61 (6225-5915 cal BC; 4-7 years old) has been buried through the plastered floor of one of the oldest building from Lepenski Vir (building 40), in a practice with Neolithic Southern Balkans and Anatolian similarities (Borić and Stefanović, 2004; Stefanović and Borić, 2008). Mostly reserved at Lepenski Vir to infants and young children, and to a few adults with non-local strontium signatures (Borić and Price, 2013), this practice may have been associated with their social construction or status. According to stable isotope values, this child has been fed with large amounts of aquatic resources, consistent with nutritional socialization (de Bechedelèvre, 2020). Similarly, the second-generation admixed female with  $\frac{3}{4}$  Neo Aegean-like ancestry (LEPE46, LV 93; 6226-6026 cal BC) was also buried into a building (building 72) with various cultural elements pointing to the Early Neolithic cultural sphere (including numerous limestone beads, as well as a fragmented stone ring and adze). In contrast, the second-generation admixed male individual with  $\frac{3}{4}$  Meso European-like ancestry (LEPE18, LV 27d; 6226-6026 cal BC) was discovered in a primary disturbed burial that contained grave goods associated with both Mesolithic (deer antler) and Neolithic (pottery fragments) communities. The other individuals, buried in extended or slightly flexed positions in continuity with local Mesolithic traditions, included the Meso European-like LEPE53 (LV 27a) and LEPE17 (LV 27b) with a mtDNA

haplogroup frequently observed in early Neolithic farmers in Europe (N1a; Supplementary Data Table 1). All had a typically local diet, rich in aquatic proteins (Supp Info). The funerary practices associated with these individuals thus reflect the mosaic pattern of the Mesolithic and Neolithic cultural assimilation at Lepenski Vir.

### ***First-generation immigrants were culturally inter-connected***

Some individuals, namely LEPE39 (LV 82), LEPE48 (LV 122) and LEPE52 (LV 73), likely represent first-generation immigrants that did not admix: they all had >96% Neo Aegean-like ancestry, had a diet distinct from that of local Meso European-like samples (Supplementary Data Table 1), and the two samples for which strontium was measured (LEPE52, LEPE48) showed non-local signatures (Borić and Price, 2013). Of those, the male LEPE52 from the Early Neolithic Period was buried in a flexed position, which is considered typical for Anatolian and Balkan Early Neolithic communities. However, the burial practices associated with the two samples from the earlier Transformation Period reflect elements likely associated with both Neolithic and Mesolithic funerary rites: The male LEPE39 has been discovered disarticulated and only the isolated skull (calvaria) of the non-local young (15-20 years) female LEPE48 was found beneath a building floor (building 47). The practice of disarticulating the skull, while also found among Early Neolithic Anatolian communities and, albeit more scarcely, in the Southern Balkans (Talalay, 2004), was common during the Mesolithic at the Danube Gorges: among the Meso European-like samples from the Danube Gorges studied here, four samples (VLASA4, VLASA10, VLASA32, VLASA41), all predating the appearance of Neo Aegean-like ancestry, were buried with signs of disarticulation. Being buried in a dwelling, on the other side, is a funerary practice frequently found in Early Neolithic Anatolian contexts (Adams and King, 2011; Brami, 2017). Together, these samples thus again attest to the gradual pattern of social integration between the groups as well as the cultural transformation triggered by this interaction at the Danube Gorges.

### **Interactions between foragers and farmers in the Danube Gorges**

While the results shown above attest to a certain degree of cultural syncretism during the Transformation Period, this does not seem to apply to all sites in the Danube Gorges. All Danube Gorges individuals for which we estimate at least some Neo Aegean-like ancestry were buried at Lepenski Vir. A single additional individual with some degree of Neo Aegean-like ancestry was previously reported from Padina (PADN\_4; (Mathieson *et al.*, 2018)), the only

other Danube Gorges site at which trapezoidal houses were found. In contrast, at the nearby site of Vlasac, the genome-wide ancestry of all seven individuals analyzed, as well as mtDNA haplogroups identified for additional 9 individuals, are all consistent with Meso European-like ancestry (Supplementary Data Table 1), in line with previous reports for Vlasac and Hajducka Vodenica (Mathieson *et al.*, 2018). The majority of these samples likely pre-date the arrival of the Neolithic. However, at least seven individuals are confidently dated to the Transformation period, making it unlikely to have missed Neo Aegean-like ancestry if it was common during this period at those sites.

A few hundred years later, in the immediate vicinity of the Danube Gorges, the sites of Vinča-Belo Brdo and Starčevo were established (Whittle *et al.*, 2002; Tasić *et al.*, 2015; Porčić *et al.*, 2021). The sites, both associated with the Neolithic Starčevo-Körös-Criș cultural complex and a subsistence more oriented towards the consumption of C3 plants (such as crops), meat/dairy products of domesticates and wild game (Filipović and Obradović, 2013; Jovanović *et al.*, 2019; Stojanovski *et al.*, 2020), paint a highly contrasting picture: For the only individual with whole-genome data available from these sites (Star1; (Marchi *et al.*, 2022)), we estimate >96% Neo Aegean-like ancestry, a signal confirmed by seven new mtDNA lineages (Supplementary Data Table 1).

Collectively, this observation suggests the continued co-existence (6200-5950 cal BC) of foraging and early farming communities if not at the same site, then at least in the same settlement area. Only in Lepenski Vir and possibly in Padina does the interaction take place at the same site -perhaps even into the Neolithic period. However, the Vlasac site was possibly no longer used as a settlement during the Transformation period, but only as an ancestral burial site by people with Meso European-like ancestry (Borić *et al.*, 2014).

Mesolithic cultural elements disappeared gradually. Several elements of the Neolithic culture, such as domesticated animals, crop consumption and a typical Neolithic symbolic repertoire, appear at Lepenski Vir only after the Transformation phase when trapezoidal houses were also abandoned and the flexed position became the new dominant mortuary canon (Porčić, Blagojević and Stefanović, 2016; Blagojević *et al.*, 2017; Jovanović *et al.*, 2019; de Becdelièvre *et al.*, 2020). This cultural change coincides with a significant population increase at Early Neolithic sites in the Central Balkans and is associated with a general population increase and a higher percentage of individuals with non-local isotope signals, suggesting a second wave of

Neolithic immigration (Borić and Price, 2013; Porčić, Blagojević and Stefanović, 2016; Blagojević *et al.*, 2017; de Bece delièvre *et al.*, 2021). In line with this view, the three first-generation immigrants at Lepenski Vir (LEPE39, LEPE48 and LEPE52) were all found to be unrelated and most likely date to different generations (Table 1). In addition, we found a lower fraction of the typical Meso European-like mtDNA haplogroup (U5) among individuals dating to the Early Neolithic Period than among individuals dating to the Transformation Period (3/15 vs. 12/23). Hence, the Neolithisation of the Danube Gorges should not be understood as a straightforward process of acculturation or a sudden behavioral shift. Results rather reflect a mosaic picture of complex behavioral interactions and increased immigrations which triggered gradual socio-cultural changes within the framework of local economic and ecological continuity.

### **Conclusion**

The analyses presented here consolidate the picture of the Neolithisation of South-Eastern and Central Europe within the framework of a demic diffusion. Using heterozygosity estimates, we show the decrease in genetic diversity from sites in NW Anatolia to those in Central Europe resulting from the demic expansion along the archaeologically attested expansion route.

At the genetic level, the interaction of early Aegean farmers with European hunter-gatherer groups along the expansion route has been demonstrated mostly indirectly: while most studies agree that about 2-6% of the genome of early Neolithic European people derives from admixture with hunter-gatherers during the Early Neolithic period, direct genetic evidence for hunter-gatherers in an early Neolithic context is limited to a single individual reported from the Körös site Tiszasszolos-Domaháza in Hungary (Gamba *et al.*, 2014), an agricultural settlement at the frontier of the Neolithic Expansion that persisted for a few generations only. Considering the large number of individuals studied from Early Neolithic sites so far, the scarcity of individuals with predominantly Meso European-like ancestry and the complete absence of early-generation admixed individuals is remarkable. In this study, for instance, we newly analyzed 21 individuals with genomic data from typical Early Neolithic sites across Europe (Herxheim, Kleinhadersdorf, Dillingen-Steinheim, Asparn-Schletz), but have not found a single individual that shows substantial Meso European-like ancestry. Cultural practices such as differentiated burial rites may be responsible for this. Another, equally plausible explanation would be that intermarriage was not tolerated at typical Neolithic core sites itself, but perhaps only in the periphery.

So is Lepenski Vir a model for an experimental outpost on the Neolithic expansion front? Could intercultural practices have been tried out here that Neolithic societies, with their “colonist ethos”

and entrenched narrow cultural practices, did not tolerate on their own land (Lüning, 2000; Özdoğan, 2011; Shennan, 2018)? Even if agriculture was not possible in the Danube Gorges, a connection to agricultural communities must have existed, as the temporal distribution of nitrogen isotope ratios shows. Whether this connection was also accompanied by gene flow from Lepenski Vir to the Neolithic communities has not been shown yet, but seems likely. Thus, sites like Lepenski Vir could well have been extramural contact zones between hunter-gatherers and early farmers, and thus responsible for the introgression of hunter-gatherer ancestry into Neolithic communities. This would not completely invalidate the alternative "dead-end theory" according to which Lepenski Vir was merely a failed early Neolithic experiment with a modified way of life, for both may be true.

## STAR Methods

### Key Resources Table

| REAGENT or RESOURCE                                                   | SOURCE     | IDENTIFIER                                                                               |
|-----------------------------------------------------------------------|------------|------------------------------------------------------------------------------------------|
| <b>Biological samples</b>                                             |            |                                                                                          |
| Ancient human bone material. Danube Gorges whole genome data          | This study | VLASA16, VLASA37, LEPE46, LEPE53, LEPE45, LEPE51                                         |
| Ancient human bone material. Danube Gorges neutralome data            | This study | VLASA4, VLASA10, VLASA32, VLASA41, VLASA44, LEPE39, LEPE52, LEPE53, LEPE18, LEPE46       |
| Ancient human bone material. Lec2 neutralome data                     | This study | Lec2                                                                                     |
| Ancient human bone material. North Eastern Europe neutralome data     | This study | Min2, Min3, Min5, Min8, Min10, Min11, ZVEJ317, ZVEJ39, ZVEJ76. ZVEJ122, ZVEJ162, ZVEJ170 |
| Ancient human bone material. Central Europe Meso nuclear capture data | This study | Fre3, Fr1, GrO1, Gr2, Bla20                                                              |
| Ancient human bone material. North Western Anatolia neutralome data   | This study | AKT6, AKT16, AKT18, AKT20, AKT26, Bar11, Bar15, Bar16, Bar20, Bar32                      |



|                                                                   |                                                                   |                                                                                                    |
|-------------------------------------------------------------------|-------------------------------------------------------------------|----------------------------------------------------------------------------------------------------|
| Ancient human bone material. Lower Austria neutralome data        | This study                                                        | Asp1, Asp2, Asp3, Asp4, Asp6, Asp8, Asp10, Klein1, Klein2, Klein3, Klein4, Klein5, Klein8, Klein10 |
| Ancient human bone material. Southern Germany neutralome data     | This study                                                        | Ess7, Dil15, Dil16, Herx, Herx2, Herx3, Herx4, Herx5, Herx6, Herx7, Herx8, Herx9                   |
| Ancient human bone material. Blätterhöhle Mid-Neo neutralome data | This study                                                        | Bla1, Bla10, Bla13, Bla15, Bla17, Bla28, Bla29, Bla75, Bla32, Bla59, Bla45                         |
| Ancient human bone material. MT capture data                      | This study                                                        | 78 as listed in Supplementary Data Table 1                                                         |
| <b>Chemicals, peptides, and recombinant proteins</b>              |                                                                   |                                                                                                    |
| Phenol/chloroform/isoamylalcohol (25:24:1)                        | Roth, Karlsruhe, Germany                                          | Cat#A156.1                                                                                         |
| AmpliTaq Gold ® Buffer II (10x)                                   | Life Technologies™                                                | Cat#4311816                                                                                        |
| AmpliTaq Gold ® DNA Polymerase                                    | Life Technologies™                                                | Cat#4311816                                                                                        |
| ATP Solution (100 mM)                                             | Life Technologies™                                                | Cat#R0441                                                                                          |
| Bovine Serum Albumin (BSA) (20 mg/ml)                             | Roche Diagnostics                                                 | Cat#10711454001                                                                                    |
| <i>Bst</i> Polymerase, Large Fragment (8 U/μl)                    | New England Biolabs GmbH                                          | Cat#M0275S                                                                                         |
| dNTPs (each 10 mM)                                                | QIAGEN, Hilden, Germany                                           | Cat#201901                                                                                         |
| dNTPs (each 25 mM)                                                | Agilent Technologies                                              | Cat#600677                                                                                         |
| EDTA (0.5 M), pH 8.0                                              | Ambion/Applied Biosystems, Life Technologies™, Darmstadt, Germany | Cat#AM9262                                                                                         |

|                                      |                                      |                |
|--------------------------------------|--------------------------------------|----------------|
| Ethanol 96% spoilt                   | Carl Roth GmbH + Co. KG              | N/A            |
| Herculase II Fusion ® DNA Polymerase | Agilent Technologies                 | Cat#600677     |
| Herculase II Reaction Buffer         | Agilent Technologies                 | Cat#600677     |
| MgCl <sub>2</sub> (25 mM)            | Life Technologies™                   | Cat#4311816    |
| Sodium N-lauryl sarcosinate          | Merck Millipore, Darmstadt, Germany  | Cat#428010     |
| Nuclease-free H <sub>2</sub> O       | Life Technologies™                   | Cat#AM9932     |
| PEG-4000                             | Thermo Scientific™                   | Cat#EL0011     |
| Proteinase K                         | Roche Diagnostics, Mannheim, Germany | Cat#3115828001 |
| T4 DNA Ligase (5 U/μl)               | Thermo Scientific™                   | Cat#EL0011     |
| T4 DNA Ligase Buffer (10X)           | Thermo Scientific™                   | Cat#EL0011     |
| T4 DNA Polymerase (5 U/μl)           | Thermo Scientific™                   | Cat#EP0062     |
| T4 Polynucleotide Kinase             | Invitrogen™                          | Cat#EK0032     |
| Tango Buffer (10x)                   | Life Technologies™                   | Cat#BY5        |
| ThermoPol Buffer (10X)               | New England Biolabs GmbH             | Cat#M0275S     |
| USER™ enzyme                         | New England Biolabs GmbH             | Cat#M5505L     |

|                                                                              |                                                               |                                                                                                                                                                                                                                                                                                                                                                                                                                                                                                                                                                                                                                                                                                                                                                                                                                    |
|------------------------------------------------------------------------------|---------------------------------------------------------------|------------------------------------------------------------------------------------------------------------------------------------------------------------------------------------------------------------------------------------------------------------------------------------------------------------------------------------------------------------------------------------------------------------------------------------------------------------------------------------------------------------------------------------------------------------------------------------------------------------------------------------------------------------------------------------------------------------------------------------------------------------------------------------------------------------------------------------|
| Trichlormethan/Chloroform                                                    | Roth,<br>Karlsruhe,<br>Germany                                | Cat#3313.1                                                                                                                                                                                                                                                                                                                                                                                                                                                                                                                                                                                                                                                                                                                                                                                                                         |
| <b>Critical commercial assays</b>                                            |                                                               |                                                                                                                                                                                                                                                                                                                                                                                                                                                                                                                                                                                                                                                                                                                                                                                                                                    |
| Agilent 2100 Expert Bioanalyzer System and High Sensitivity DNA Analysis Kit | Agilent Technologies                                          | Cat#5067-4626 (kit)                                                                                                                                                                                                                                                                                                                                                                                                                                                                                                                                                                                                                                                                                                                                                                                                                |
| Qubit Fluorometric quantitation and dsDNA HS Assay Kit                       | Invitrogen                                                    | Cat#Q32854 (kit)<br>Cat#Q32856 (tubes)                                                                                                                                                                                                                                                                                                                                                                                                                                                                                                                                                                                                                                                                                                                                                                                             |
| <b>Deposited data</b>                                                        |                                                               |                                                                                                                                                                                                                                                                                                                                                                                                                                                                                                                                                                                                                                                                                                                                                                                                                                    |
| Sequencing data (this study)                                                 | European Nucleotide Archive                                   | <a href="https://www.ebi.ac.uk/ena/browser/view/PRJEB47916">https://www.ebi.ac.uk/ena/browser/view/PRJEB47916</a>                                                                                                                                                                                                                                                                                                                                                                                                                                                                                                                                                                                                                                                                                                                  |
| Human reference sequence (hs37d5)                                            | (Mallick <i>et al.</i> , 2016)                                | <a href="ftp://ftp.1000genomes.ebi.ac.uk/vol1/ftp/technical/reference/phase2_reference_assembly_sequence/hs37d5.fa.gz">ftp://ftp.1000genomes.ebi.ac.uk/vol1/ftp/technical/reference/phase2_reference_assembly_sequence/hs37d5.fa.gz</a>                                                                                                                                                                                                                                                                                                                                                                                                                                                                                                                                                                                            |
| 20 samples from Simons Genome Diversity Panel                                | (Mallick <i>et al.</i> , 2016)                                | <a href="https://www.ebi.ac.uk/ena/browser/view/PRJEB9586">https://www.ebi.ac.uk/ena/browser/view/PRJEB9586</a> .<br>LP6005592-DNA_C01_S_Saami-1,<br>LP6005442-DNA_D10_S_Finnish-1,<br>LP6005442-DNA_E10_S_English-1,<br>LP6005442-DNA_B11_S_Spanish-2,<br>LP6005441-DNA_B05_S_French-2,<br>LP6005441-DNA_B06_S_Bergamo-2,<br>LP6005441-DNA_D11_S_Sardinian-2,<br>LP6005443-DNA_H05_S_Czech-2,<br>LP6005592-DNA_E02_S_Polish-1,<br>LP6005442-DNA_B08_S_Hungarian-1,<br>LP6005442-DNA_A03_S_Bulgarian-1,<br>LP6005677-DNA_B01_S_Albanian-1,<br>LP6005442-DNA_G07_S_Greek-1,<br>LP6005677-DNA_A03_S_Turkish-2,<br>LP6005442-DNA_B04_S_Georgian-1,<br>LP6005441-DNA_B02_S_BantuKenya-2,<br>LP6005677-DNA_D03_S_Khomani_San-1,<br>LP6005592-DNA_C05_S_Khomani_San-2,<br>LP6005441-DNA_F07_S_Mandenka-2,<br>LP6005441-DNA_B08_S_Mbuti-2 |
| Danube genomes                                                               | (Marchi <i>et al.</i> , 2022)                                 | VLASA7, VLASA32, LEPE48, LEPE52                                                                                                                                                                                                                                                                                                                                                                                                                                                                                                                                                                                                                                                                                                                                                                                                    |
| North Western Anatolia and Aegean genomes                                    | (Hofmanová <i>et al.</i> , 2016; Marchi <i>et al.</i> , 2022) | Bar25, AKT16, Bar31, Bar8, Rev5, Klei10, Rev5                                                                                                                                                                                                                                                                                                                                                                                                                                                                                                                                                                                                                                                                                                                                                                                      |

|                                                   |                                                                                                                                 |                                                                                                                                                                                                                                                                                                                                                                                                                                                                  |
|---------------------------------------------------|---------------------------------------------------------------------------------------------------------------------------------|------------------------------------------------------------------------------------------------------------------------------------------------------------------------------------------------------------------------------------------------------------------------------------------------------------------------------------------------------------------------------------------------------------------------------------------------------------------|
| North Greece genomes                              | (Marchi <i>et al.</i> , 2022)                                                                                                   | Nea2, Nea3                                                                                                                                                                                                                                                                                                                                                                                                                                                       |
| Serbia genomes                                    | (Marchi <i>et al.</i> , 2022)                                                                                                   | STAR1, VC3-2                                                                                                                                                                                                                                                                                                                                                                                                                                                     |
| Austria genomes                                   | (Marchi <i>et al.</i> , 2022)                                                                                                   | Asp6, Klein7                                                                                                                                                                                                                                                                                                                                                                                                                                                     |
| Germany genomes                                   | (Lazaridis <i>et al.</i> , 2014; Marchi <i>et al.</i> , 2022)                                                                   | Dil16, Ess7, Herx, Stuttgart                                                                                                                                                                                                                                                                                                                                                                                                                                     |
| Sunghir genomes                                   | (Sikora <i>et al.</i> , 2017)                                                                                                   | SunghirI, SunghirII, SunghirIII, SunghirIV                                                                                                                                                                                                                                                                                                                                                                                                                       |
| Abdul Hosein, Wezmeh Cave and Boncuklu genomes    | (Broushaki <i>et al.</i> , 2016; Kiliñç <i>et al.</i> , 2016)                                                                   | AH1, AH2, AH4, WC1, Bon002                                                                                                                                                                                                                                                                                                                                                                                                                                       |
| Kotias, Satsurbia, Balkan and Scandinavia genomes | (Lazaridis <i>et al.</i> , 2014; Jones <i>et al.</i> , 2015, 2017; Günther <i>et al.</i> , 2018)                                | KK1, Satsurbia, Latvia_HG2, Latvia_HG3, Latvia_MN2, Latvia_HG1, Hum1, Hum2, SF9, Steigen, Motala12                                                                                                                                                                                                                                                                                                                                                               |
| Central Europe Meso genomes                       | (Lazaridis <i>et al.</i> , 2014; Olalde <i>et al.</i> , 2014; Jones <i>et al.</i> , 2015; González-Fortes <i>et al.</i> , 2017) | Bichon, Loschbour, LaBrana, Canes1-Meso, Chan-Meso, OC1-Meso, SC2-Meso, GB1-Eneo                                                                                                                                                                                                                                                                                                                                                                                 |
| Hungarian genomes                                 | (Gamba <i>et al.</i> , 2014)                                                                                                    | KO1, NE1                                                                                                                                                                                                                                                                                                                                                                                                                                                         |
| Cova Bonica and Ajvice genomes                    | (Skoglund <i>et al.</i> , 2014; Olalde <i>et al.</i> , 2015)                                                                    | CB13, Ajv58                                                                                                                                                                                                                                                                                                                                                                                                                                                      |
| 1240K capture sites                               | (Mathieson <i>et al.</i> , 2015)                                                                                                |                                                                                                                                                                                                                                                                                                                                                                                                                                                                  |
| Allen Ancient DNA Resource v42.4 and v37.2        | Reich lab public data release                                                                                                   | <a href="https://reichdata.hms.harvard.edu/pub/datasets/amh_repo/curated_releases/index_v42.4.html">https://reichdata.hms.harvard.edu/pub/datasets/amh_repo/curated_releases/index_v42.4.html</a> ;<br><a href="https://reich.hms.harvard.edu/allen-ancient-dna-resource-aadr-downloadable-genotypes-present-day-and-ancient-dna-data">https://reich.hms.harvard.edu/allen-ancient-dna-resource-aadr-downloadable-genotypes-present-day-and-ancient-dna-data</a> |
| genomic masks                                     | UCSC genome browser                                                                                                             | <a href="http://hgdownload.cse.ucsc.edu/goldenpath/hg19">http://hgdownload.cse.ucsc.edu/goldenpath/hg19</a>                                                                                                                                                                                                                                                                                                                                                      |

|                                                  |                                                                                                                                                                                            |                                                                                                                                                                                                                                                                                                                         |
|--------------------------------------------------|--------------------------------------------------------------------------------------------------------------------------------------------------------------------------------------------|-------------------------------------------------------------------------------------------------------------------------------------------------------------------------------------------------------------------------------------------------------------------------------------------------------------------------|
| strict callability mask from 1000G               | (1000 Genomes Project Consortium <i>et al.</i> , 2015)                                                                                                                                     | <a href="http://ftp.1000genomes.ebi.ac.uk/vol1/ftp/release/20130502/supporting/accessible_genome_masks/">http://ftp.1000genomes.ebi.ac.uk/vol1/ftp/release/20130502/supporting/accessible_genome_masks/</a>                                                                                                             |
| 37,574 1kb long genomic loci                     | (Gronau <i>et al.</i> , 2011)                                                                                                                                                              | <a href="http://compugen.cshl.edu/GPhoCS/data.php">http://compugen.cshl.edu/GPhoCS/data.php</a>                                                                                                                                                                                                                         |
| Known InDel positions                            | Consortium and The 1000 Genomes Project Consortium, 2015                                                                                                                                   | <a href="ftp://gsapubftp-anonymous@ftp.broadinstitute.org/bundle/b37/1000G_phase1.indels.b37.vcf.gz">ftp://gsapubftp-anonymous@ftp.broadinstitute.org/bundle/b37/1000G_phase1.indels.b37.vcf.gz</a>                                                                                                                     |
| Known InDel positions                            | Consortium and The 1000 Genomes Project Consortium, 2015                                                                                                                                   | <a href="ftp://gsapubftp-anonymous@ftp.broadinstitute.org/bundle/b37/Mills_and_1000G_gold_standard.indels.b37.vcf.gz">ftp://gsapubftp-anonymous@ftp.broadinstitute.org/bundle/b37/Mills_and_1000G_gold_standard.indels.b37.vcf.gz</a>                                                                                   |
| GERP scores                                      | (Cooper <i>et al.</i> , 2005), ENSEMBL                                                                                                                                                     | <a href="http://ftp.ensembl.org/pub/release-96/compara/conservation_scores/88_mammals.gerp_conservation_score/gerp_conservation_scores.homo_sapiens.GRCh38.bw">http://ftp.ensembl.org/pub/release-96/compara/conservation_scores/88_mammals.gerp_conservation_score/gerp_conservation_scores.homo_sapiens.GRCh38.bw</a> |
| <b>Oligonucleotides</b>                          |                                                                                                                                                                                            |                                                                                                                                                                                                                                                                                                                         |
| MYBait kit                                       | Arbor biosciences; <a href="https://arborbiosci.com/genomics/targeted-sequencing/mybaits/mybaits-custom/">https://arborbiosci.com/genomics/targeted-sequencing/mybaits/mybaits-custom/</a> | N/A                                                                                                                                                                                                                                                                                                                     |
| SureSelect™ XT in-solution target enrichment kit | Agilent Technologies (custom design); (Gnirke <i>et al.</i> , 2009)                                                                                                                        | N/A                                                                                                                                                                                                                                                                                                                     |

|                                          |                                                                                                                                               |                                                                                                                                                                             |
|------------------------------------------|-----------------------------------------------------------------------------------------------------------------------------------------------|-----------------------------------------------------------------------------------------------------------------------------------------------------------------------------|
| P5 and P7                                | (Meyer and Kircher, 2010)<br>IDT, Leuven, Belgium                                                                                             | N/A                                                                                                                                                                         |
| IS4, IS5, IS6 and IS7                    | (Meyer and Kircher, 2010)<br>IDT, Leuven, Belgium                                                                                             | N/A                                                                                                                                                                         |
| <b>Software and algorithms</b>           |                                                                                                                                               |                                                                                                                                                                             |
| fastqc                                   | <a href="http://www.bioinformatics.babraham.ac.uk/projects/fastqc/">www.bioinformatics.babraham.ac.uk/projects/fastqc/</a>                    | <a href="http://www.bioinformatics.babraham.ac.uk/projects/fastqc/">www.bioinformatics.babraham.ac.uk/projects/fastqc/</a>                                                  |
| Trim Galore!                             | <a href="https://www.bioinformatics.babraham.ac.uk/projects/trim_galore/">https://www.bioinformatics.babraham.ac.uk/projects/trim_galore/</a> | <a href="https://www.bioinformatics.babraham.ac.uk/projects/trim_galore/">https://www.bioinformatics.babraham.ac.uk/projects/trim_galore/</a>                               |
| bwa mem - Burrows-Wheeler Alignment Tool | (Li 2013)                                                                                                                                     | <a href="https://github.com/lh3/bwa">https://github.com/lh3/bwa</a>                                                                                                         |
| SAMtools                                 | (Li <i>et al.</i> , 2009)                                                                                                                     | <a href="https://github.com/samtools/samtools">https://github.com/samtools/samtools</a>                                                                                     |
| Picard-tools                             | <a href="http://broadinstitute.github.io/picard/">http://broadinstitute.github.io/picard/</a>                                                 | <a href="http://broadinstitute.github.io/picard/">http://broadinstitute.github.io/picard/</a>                                                                               |
| seqtk                                    | <a href="https://github.com/lh3/seqtk">https://github.com/lh3/seqtk</a>                                                                       | <a href="https://github.com/lh3/seqtk">https://github.com/lh3/seqtk</a>                                                                                                     |
| GATK                                     | (DePristo <i>et al.</i> , 2011)                                                                                                               | <a href="https://github.com/broadinstitute/gatk/releases">https://github.com/broadinstitute/gatk/releases</a>                                                               |
| Snakemake                                | (Koster and Rahmann, 2012)                                                                                                                    | <a href="https://snakemake.readthedocs.io/en/stable/getting_started/installation.html">https://snakemake.readthedocs.io/en/stable/getting_started/installation.html</a>     |
| ATLAS                                    | (Link <i>et al.</i> , 2017)                                                                                                                   | <a href="https://bitbucket.org/wegmannlab/atlas/wiki/Installing%20and%20Running%20ATLAS">https://bitbucket.org/wegmannlab/atlas/wiki/Installing%20and%20Running%20ATLAS</a> |
| ContamMix                                | (Fu <i>et al.</i> , 2014)                                                                                                                     | N/A                                                                                                                                                                         |
| MIA                                      | <a href="https://github.com/mpieva/mapping-iterative-assembler">https://github.com/mpieva/mapping-iterative-assembler</a>                     | <a href="https://github.com/mpieva/mapping-iterative-assembler">https://github.com/mpieva/mapping-iterative-assembler</a>                                                   |
| mafft                                    | (Kato <i>et al.</i> , 2002)                                                                                                                   | <a href="https://mafft.cbrc.jp/alignment/software/">https://mafft.cbrc.jp/alignment/software/</a>                                                                           |

|            |                                                                                                                                      |                                                                                                                                                       |
|------------|--------------------------------------------------------------------------------------------------------------------------------------|-------------------------------------------------------------------------------------------------------------------------------------------------------|
| ANGSD      | (Korneliusson, Albrechtsen and Nielsen, 2014)                                                                                        | <a href="https://github.com/ANGSD/angsd">https://github.com/ANGSD/angsd</a>                                                                           |
| Haplogrep  | (Weissensteiner <i>et al.</i> , 2016)                                                                                                | <a href="https://haplogrep.i-med.ac.at/category/haplogrep2/">https://haplogrep.i-med.ac.at/category/haplogrep2/</a>                                   |
| entropy2   | (Shastri <i>et al.</i> , 2021)                                                                                                       | <a href="https://bitbucket.org/buerklelab/mixedploidy-entropy/src/master/">https://bitbucket.org/buerklelab/mixedploidy-entropy/src/master/</a>       |
| NGSadmix   | (Skotte, Korneliusson and Albrechtsen, 2013)                                                                                         | <a href="http://www.popgen.dk/software/index.php/NgsAdmix">http://www.popgen.dk/software/index.php/NgsAdmix</a>                                       |
| pcAngsd    | (Meisner and Albrechtsen, 2018)                                                                                                      | <a href="https://github.com/Rosemeis/pcangsd">https://github.com/Rosemeis/pcangsd</a>                                                                 |
| bedtools   | (Quinlan and Hall, 2010)                                                                                                             | <a href="https://bedtools.readthedocs.io/en/latest/content/installation.html">https://bedtools.readthedocs.io/en/latest/content/installation.html</a> |
| hgLiftOver | <a href="https://genome.ucsc.edu/cgi-bin/hgLiftOver">https://genome.ucsc.edu/cgi-bin/hgLiftOver</a>                                  | <a href="https://genome.ucsc.edu/cgi-bin/hgLiftOver">https://genome.ucsc.edu/cgi-bin/hgLiftOver</a>                                                   |
| NRE        | (Arbiza, Zhong and Keinan, 2012)                                                                                                     | <a href="http://nre.cb.bscb.cornell.edu">http://nre.cb.bscb.cornell.edu</a>                                                                           |
| plink2     | (Chang <i>et al.</i> , 2015)                                                                                                         | <a href="https://www.cog-genomics.org/plink/2.0/">https://www.cog-genomics.org/plink/2.0/</a>                                                         |
| convertf   | <a href="https://reich.hms.harvard.edu/software/InputFileFormats">https://reich.hms.harvard.edu/software/InputFileFormats</a>        | <a href="https://reich.hms.harvard.edu/software/InputFileFormats">https://reich.hms.harvard.edu/software/InputFileFormats</a>                         |
| R          | R Core Team (2019). R: A language and environment for statistical computing. R Foundation for Statistical Computing, Vienna, Austria | <a href="https://www.R-project.org/">https://www.R-project.org/</a>                                                                                   |

|                                                           |                                             |                                                                                 |
|-----------------------------------------------------------|---------------------------------------------|---------------------------------------------------------------------------------|
| hapROH                                                    | (Ringbauer, Novembre and Steinrücken, 2021) | <a href="https://pypi.org/project/hapROH/">https://pypi.org/project/hapROH/</a> |
| HirisPlex-S webtool                                       | (Chaitanya <i>et al.</i> , 2018)            | <a href="https://hirisplex.erasmusmc.nl/">https://hirisplex.erasmusmc.nl/</a>   |
| <b>Other</b>                                              |                                             |                                                                                 |
| Amicon Ultra-15 Centrifugal Filter Units, 30kDa and 50kDa | Merck Millipore, Darmstadt, Germany         | Cat#UFC803096 and Cat#UFC905096                                                 |
| MinElute <sup>®</sup> PCR Purification Kit                | QIAGEN, Hilden, Germany                     | Cat#28006                                                                       |
| MSB <sup>®</sup> Spin PCRapace                            | Invitek, Stratec Molecular, Berlin, Germany | Cat#1020220400                                                                  |
| QIAquick PCR Purification Kit                             | Qiagen                                      | Cat#28106                                                                       |

## Resource Availability

### Lead Contact

Further information and requests for resources and reagents should be directed to and will be fulfilled by the Lead Contacts, Joachim Burger ([jburger@uni-mainz.de](mailto:jburger@uni-mainz.de)) and Daniel Wegmann ([daniel.wegmann@unifr.ch](mailto:daniel.wegmann@unifr.ch)).

### Materials Availability

Genomic data are available at the European Nucleotide Archive under the accession number PRJEB47916 in BAM and FASTQ format. Mitochondrial capture data are available at GenBank.



## Data and Code Availability

All genomic data used in this study is publicly available at the European Nucleotide Archive under the accession number PRJEB47916 or at the sources listed in the Key Resources Table. The pipeline used to process the raw data is available on <https://bitbucket.org/wegmannlab/atlas-pipeline/src/master/>. The code used to plot relatedness is available on Bitbucket at <https://bitbucket.org/wegmannlab/atlas/downloads/Relatedness.R>.

## Experimental Model and Subject Details

### Archaeological context

The samples analyzed in this study have been obtained from archaeological collections with permission of the responsible curators or excavators.

#### *Barcın*

The Barcın Höyük was occupied without interruptions between 6,600-6,000 cal BC (Gerritsen, Özbal and Thissen, 2013) and shows continuity from pre-Fikirtepe to Fikirtepe horizons of the Neolithic period ((Hofmanová *et al.*, 2016); Suppl. S4-S5). While the site shares common elements with other Fikirtepe sites in the Marmara region, there were differences in architecture and dietary habits noted between flat sites (e.g., Aktopraklık) and tell sites (e.g., Barcın) (Karul and Avcı, 2013). This site is the oldest known Neolithic occupation in NW Anatolia (Gerritsen, Özbal and Thissen, 2013) and from the start, the food economy was fully agrarian with absence of an earlier transitional phase from foraging to farming (Arbuckle *et al.*, 2014). The dead were buried at several locations within the settlement: neonates and infants were buried within or close to the houses, generally next to the walls, whereas juveniles and adults were buried in primary single burials in the central courtyard (Alpaslan Roodenberg, Gerritsen and Özbal, 2013).

#### *Aktopraklık*

Aktopraklık is a flat inland Fikirtepe site about 25 km from the city of Bursa (Marmara region) and its excavation showed uninterrupted occupation from the middle of the 7th millennium BC to the middle of the 6th millennium BC (Karul and Avcı, 2013). Site Aktopraklık C served as a settlement (with associated human remains) during the earlier phases and as a cemetery during the later phases (the settlement moved to Aktopraklık B during the Chalcolithic) (Karul and Avcı,

2011). In the Neolithic phase, the individuals were buried close to buildings or beneath them (Songül Alpaslan-Roodenberg and Roodenberg, 2020).

### *Asparn-Schletz*

Asparn-Schletz is a large settlement enclosed by two ditch systems (Windl, 2009) with signs of occupation (Windl, 1999). There were 20 burials in the ditch and 130 individuals interred without a classical burial, often with perimortem trauma and likely buried some time after death (Teschler-Nicola, 2012). The burials predate the presumably violent event that has taken place in the end of the LBK, ca. 7150-6900 BP (Wild *et al.*, 2004) and possibly the site was abandoned after this (Windl, 2009).

### *Kleinhadersdorf*

The classical LBK cemetery, the largest such site in Austria, was located close to a LBK settlement and is dated to the second half of the 6th millennium BC (Neugebauer-Maresch and Lenneis, 2015). Features of the lithic technology and red ochre have been interpreted in the past as possible signals of continuation of Mesolithic traditions (Mateiciucová, 2015). Most graves were single primary inhumations in a contracted position on the left side typical of LBK with some exceptions (burials on the back, possible cenotaphs) (Neugebauer-Maresch and Lenneis, 2015; Tiefenböck and Teschler-Nicola, 2015).

### *Essenbach-Ammerbreite*

Essenbach-Ammerbreite was an LBK cemetery close to an LBK settlement (Brink-Kloke, 1990). The same individual as in (Marchi *et al.*, 2022) has been analysed in this study, namely Ess7, a child from grave 7.

### *Dillingen-Steinheim*

Dillingen-Steinheim is a LBK cemetery of 27 classical burials (Nieszery, 1995), some in a ditch (Marchi *et al.*, 2022). Two such individuals, analyzed in this study were Dil15 and Dil16 (graves 23 and 24, respectively) and they have been dated to  $5,116 \pm 118$  cal. BC (Pechtl, 2015). They have been found to be brothers (see Results).

### *Herxheim*

Herxheim is a well-known site, especially in relation to violence during the Early Neolithic period. The site is enclosed by two ditch segments that contained remains of more than 500 individuals (Haack, 2016; Zeeb-Lanz, 2016, 2019) with signs of perimortem and postmortem violence on the skeletons (Boulestin and Coupey, 2015). Interestingly, individuals formally buried showed a local range of Sr values in contrast to the scattered remains that showed more often a non-local signal (Turck, 2019).

#### *Lesnik cave*

The site of Lesnik cave is located near Yalta, Ukraine. The analyzed sample (Lec2) was not directly dated, but based on the contextual finds, Lec2 was placed in the early Mesolithic or Late Palaeolithic of the region. The other human sample (Lec1) from this cave, was dated to 11260 $\pm$ 45 BP (OxA-19112), cal Oxcal 4.4 11292-11144 BC (Ridush, 2009; Schulz, 2016).

#### *Zvejnieki*

Zvejnieki in northern Latvia is a cemetery where individuals were buried from the middle Mesolithic to Neolithic period, from the 8th to 4th millennia BC (Eriksson, Lõugas and Zagorska, 2003; Stutz, Larsson and Zagorska, 2013). Individuals at the site were partially mobile and the inhumations did not respect one another, suggesting the absence of knowledge of previous burial placement in some later periods (Larsson *et al.*, 2017).

#### *Minino*

While the site of Minino, Russia, is dated from the Palaeolithic to Neolithic, the main part is assigned to the Mesolithic period when burial complexes are very rare. The ages of the samples range from 5650-4600 cal BC to 8671 $\pm$ 48 cal BC (Wood *et al.*, 2013).

#### *Criewen*

Criewen, discovered in northern Germany, provided this study with samples associated with a non-agricultural context that were dated to 4770 $\pm$ 40 cal BC (Gr1) and 4600 $\pm$ 60 cal BC (Gr2) (Geisler and Wetzel, 1999). One of the samples was buried with ca. 3,000 perforated shells (Street *et al.*, 2001).

#### *Groß Fredenwalde*

At Groß Fredenwalde, at least eight burials have been found with 12 individuals. The site was dated from 6,400 cal BC to 4,900 cal BC with one individual overlapping with the presence of

farmers in the region in approx. 5,200 cal BC (Terberger *et al.*, 2015; Kotula, Piezonka and Terberger, 2020).

### *Große Ofnet Höhle*

33 skulls separated from their postcranial skeletons have been found at the site. They date to 5770 cal BC (Walde *et al.*, 1986; Orschiedt, 1998).

### *Blätterhöhle*

Blätterhöhle shows signs of human occupation from the Mesolithic to Late Neolithic. During the Mesolithic, the site has been used as a sporadic settlement. Human remains have been discovered inside the cave in a disturbed context, showing presence of hunter-gatherers and farmers through time but also in parallel (human remains from individuals with different subsistence were differentiated by isotopic analysis) (Orschiedt *et al.*, 2012; Bollongino *et al.*, 2013).

### *Lepenski Vir*

This large and famous settlement in the Danube Gorges is a type-site of the Lepenski Vir culture (sometimes called Lepenski Vir-Schela Cladovei culture). The site with its abundance of burials has been under discussion ever since its excavation (started 1965 by Dragoslav Srejenović) and the chronology of the area has been revised with the use of radiocarbon dating corrected for freshwater reservoir effect (Borić, 2002). The sampling strategy and further details about the site are provided in other parts of this study.

### *Vlasac*

The Vlasac site is geographically very close to Lepenski Vir (cca 3 km downstream) and was first excavated in the same period as Lepenski Vir (Boroneanț, 2011). The site was assigned to the Lepenski Vir culture and is mostly dated to Late Mesolithic, while there are dates as old as 9,800 cal BC known from the site (Bonsall *et al.*, 2000; Borić and Stefanović, 2004; Borić, French and Dimitrijević, 2008). Additionally, new excavations (during seasons 2006–2009) showed that there was also an occupation parallel to the Transformation phase of Lepenski Vir with appearance of features influenced by the Neolithic (Early Starčevo ceramics, Spondylus shells and discoid beads) (Borić *et al.*, 2014). Most of the settlement was abandoned

~6,300/6,200 cal BC, but the site might have served as an “ancestral” place and a cemetery for burial rites of Mesolithic tradition during the last centuries of the 7th millennium BC (Borić *et al.*, 2014).

#### *Grivac*

This well-stratified Neolithic site in central Serbia contains both proto-Starčevo and Vinča layers (Bogdanović, 2008; Porčić, Blagojević and Stefanović, 2016). The individual included in this study (Gri1) was buried in grave 1.

#### *Padina*

Padina is a Danube Gorges site with a superposition of Mesolithic and Early Neolithic structures. It is associated with the Lepenski Vir culture, with additional later layers of Late Neolithic cultures present at the site (Borić and Miracle, 2004). The only ancient individual successfully analysed from this site (Pad 11, burial 30) is assigned to the Early/Middle Mesolithic (~9,500-7,400 cal BC) (Borić and Price, 2013).

#### *Ostrovul Corbului*

Ostrovul Corbului is located on the Romanian side of the Danube Gorges, downstream from Lepenski Vir. It was originally assigned to the Schela Cladovei culture, which was later connected to the Lepenski Vir culture (Boroneanț, 2011). There are Mesolithic and Neolithic layers at the site (Roksandić, 1999).

#### *Vinča-Belo Brdo*

Vinča-Belo Brdo is a typical site of the eponymous Vinča culture with key Neolithic developments such as the formation of large settlements and tells, the intensification of farming subsistence and the expansion of material networks (Tasić *et al.*, 2015). The culture occupied a large region of Serbia and several bordering countries between the late 6th millennium BC and middle 5th millennium BC (Borić, 2015). The only burial at the site is a collective burial at the lowermost level (Dimitrijević, 2014) and it is still under discussion whether this Starčevo level represents continuous occupation to later phases or an earlier abandoned settlement (Borić, 2009). The collective burial can be dated to 5,476-5,304 cal BC (Borić, 2009) and the samples analyzed here are coming from this context.

## *Sultana Malu Roşu*

This Eneolithic site is located on the bank of the Mostiştea River, about 15 km from the Danube (approximately 500 km from the Danube Gorges) (Lazăr *et al.*, 2008).

## Method Details

### Sample preparation

Sample preparation took place in a dedicated ancient DNA facility of the Paleogenetics Group at the Institute of Organismic and Molecular Evolution (iomE) at the Johannes Gutenberg-University in Mainz, following and further improving guidelines for good practices in ancient DNA analysis (Bramanti *et al.*, 2009; Bollongino *et al.*, 2013; Scheu *et al.*, 2015). We processed blank controls alongside milling, extraction and library built to control for the decontamination procedure of the devices used. Sample treatment and library preparation were performed as described in (Kircher, Sawyer and Meyer, 2012) with the adaptations described in (Scheu *et al.*, 2015) and (Hofmanová *et al.*, 2016). Sample specific modifications/adaptations are noted in Supplementary Data Table 1. 12 samples underwent a pre-lysis step during DNA extraction as described in (Scheu *et al.*, 2015) in order to increase the percentage of endogenous yields. USER™ (NEB) treatment of the DNA extract was performed for 181 libraries prior to Library preparation. To increase library complexity, we amplified each library in three or six PCR-parallels.

### Quality assessment

With the first library of each sample, we estimated library complexity by quantitative real time PCR (qPCR) as described in (Meyer and Kircher, 2010; Hofmanová *et al.*, 2016). Additionally, we performed a shallow screening on an Illumina Miseq (50 bp, single end sequencing) that was analyzed with the pipeline described in (Hofmanová *et al.*, 2016).

### Library preparation and Target enrichment

Based on the endogenous DNA content (fraction of reads aligning to the reference genome) and the qPCR results (Figure S1A) we chose three strategies on a per sample basis, for which additional extractions and libraries were created: 1) We chose samples of highest quality for

whole genome sequencing, aiming to obtain genomes of differing ages from the Danube Gorges. Selected samples were sequenced on an Illumina HiSeq2500 (100bp paired-end or single-end) and an Illumina NextSeq (75bp paired-end). 2) We also selected a total of 75 high quality samples to perform a nuclear target enrichment (nuclear capture). The capture array of 5Mb sites (i.e. neutralomes) followed the protocol as described in (Veeramah *et al.*, 2018) with some alterations. Sequencing was performed on an Illumina HiSeq 2500 with 100bp single-end or paired-end runs and on an Illumina NextSeq with 75bp paired-end sequencing at the University of Mainz. 3) We performed mitochondrial target enrichment for samples with relatively low DNA quality. Target enrichment was performed two times (double capture) following the methods described in (Hofmanová *et al.*, 2016), with the exception, that PCR purification was performed with QIAquick PCR Purification Kit columns (QIAGEN®) according to the companies protocol, eluting in 33µl preheated (65°C) elution buffer for 5 minutes. For 9 samples (Supplementary Data Table 1), the supernatants from both nuclear target enrichment steps containing non-target DNA, were used to perform an additional mitochondrial capture experiment (supernatant capture). The supernatants were purified with QIAquick PCR Purification Kit columns prior to the first mitochondrial target enrichment. Samples were pooled equimolarly and sequenced at GENterprise GENOMICS (Mainz) on an Illumina MiSeq sequencing system with 50 cycles single-end or on an Illumina HiSeq sequencing system with 100 cycles paired-end. Mitochondrial data was additionally gained as by-products of the previous two strategies.

### Bioinformatic processing

The mitochondrial captures were processed as described in (Hofmanová, 2016; Hofmanová *et al.*, 2016). Read statistics can be found in Supplementary Data Table 1. For all 134 ancient genomes and neutralomes, alignment, local realignment, PMD and recal estimation were processed with commit `9ec713b` of the ATLAS-Pipeline ([bitbucket.org/wegmannlab/atlas-pipeline/wiki/Home](http://bitbucket.org/wegmannlab/atlas-pipeline/wiki/Home)) with some minor changes depending on how the data were obtained as indicated below and in Supplementary Data Table 1. Reads were trimmed with length filter  $\geq 30$  (*TrimGalore*, v0.6.4, <https://github.com/FelixKrueger/TrimGalore>), aligned with *bwa-mem* (v0.7.17, (Li, 2013)) to the hs37d5 reference (Mallick *et al.*, 2016), filtered for mapping quality  $< 30$ , sorted and indexed (*SAMtools*, v.1.9, (Li *et al.*, 2009)). Read groups were added with *picard-tools* (v2.21.1, <http://broadinstitute.github.io/picard/>) to keep track of libraries. Unmapped reads, orphans and

secondary alignments were removed with *SAMtools*, and duplicates were marked with *picard-tools* before and after merging the library BAMfiles per sample. For neutralomes, we merged all BAMfiles into one *master* BAMfile for further processing. A custom script was run to download data, mark duplicates and filter out reads as above for 20 SGDP BAMfiles (Mallick *et al.*, 2016). All samples underwent Local Realignment (*GATK*, v.3.7; (DePristo *et al.*, 2011)) using a union interval set of 30 samples plus the target sample (*RealignerTargetCreator*), and a guidance set of 12 samples for realigning along the target sample with *IndelRealigner* (Supplementary Data Table 2). We used *ATLAS* (v0.9; (Link *et al.*, 2017)) with commit 7c1e6a4, unless indicated otherwise, and filterSoftClips option to split/merge single-end/paired-end reads (task=splitMerge) which generated our final processed BAMfiles. See Table 1 and S1 for more information.

## Quantification and Statistical Analysis

### Library and Sample Statistics

We used *ATLAS* (task=BAMDiagnostics and task=depthPerSiteDist) and *SAMtools* flagstat to determine read counts, sequencing depth, endogenous DNA-content and further statistics that are listed in Supplementary Data Table 1 for each library parallel and merged samples.

### Molecular Sex Determination

Using the script by (Skoglund *et al.*, 2013) obtained from [https://github.com/pontussk/ry\\_compute](https://github.com/pontussk/ry_compute), we determined the molecular sex of individuals by calculating the ratio of reads aligned to the Y chromosome over the total number of reads aligned to X and Y. Ratios of 0.075 or higher indicate males and ratios below 0.016 indicate females (Figure S1C). It was run with default settings as suggested by Skoglund's documentation.

### Ancient DNA Authenticity

The blank controls from milling, extraction, library and capture experiments were measured by Qubit® Fluorometric quantitation (dsDNA HS assay, Invitrogen, Carlsbad, California, United States) and on an Agilent 2100 Bioanalyzer (HS DNA, Agilent Technologies, Waldbronn,



Germany). Mitochondrial capture controls were sequenced alongside the capture sequencing. The concentration of potential contaminants was never higher than 2.1 ng/ul and the screening results showed a maximum of 39 aligning reads per blank control (out of a potential share of 80.000 reads). PMD-patterns were checked for all samples to show the characteristic exponential pattern of ancient DNA (Figure S1B). We estimated contamination on mitochondrial regions with *ContamMix* (v1.0; (Fu *et al.*, 2014)) and for male individuals on the X-chromosomal regions with ANGSD (v0.917-108-g2f9cc4b; (Rasmussen *et al.*, 2011; Korneliussen, Albrechtsen and Nielsen, 2014)). As the nuclear capture regions do not span the mitochondrial DNA and only contain few regions on the X-chromosome, we require a minimum of 10X depth over the mitochondrial genome (to assure correct consensus-calls) combined with a mt/nuc ratio below 200 (Furtwängler *et al.*, 2018), as well as a minimum of 100 SNPs for ANGSD estimation to rely on the results of contamination estimation (Nägele *et al.*, 2020). The detailed results can be found in Supplementary Data Table 1.

## mt-DNA analysis

### mt-Capture of nuclear capture supernatants

An additional mitochondrial target enrichment experiment on the supernatant of a nuclear target enrichment experiment - meaning the DNA not hybridized on the nuclear target - yielded a significantly higher percentage of endogenous reads aligning to the mitochondrial genome than the conservative mt-capture (t-test 4.0,  $p=2.3e-04$ ). This could be explained by a higher percentage of mitochondrial fragments in the hybridisation process as well as a potential lack of steric hindrance in the hybridisation process as much longer nuclear molecules have been removed. Yet, the fold-coverage is significantly lower for supernatant captures (t-test -6.5,  $p=5.75e-08$ ). This is expected, as several additional purification steps are performed on supernatant captures, accompanied by a severe loss of molecules. As a supernatant capture will only be performed after a nuclear capture, and therefore on high-quality samples, it can be recommended for further experiments to reduce the amount of sample material used.

### mt-DNA Haplogroups

In order to determine the mitochondrial haplotypes from nuclear genomic data, majority allele calls on the MT genome were created with ATLAS (task=call method=majorityBase). The output

VCF files were merged and uploaded to the HaploGrep 2.0 Website (Weissensteiner *et al.*, 2016). The mitochondrial haplotypes for mitochondrial capture experiments were obtained as described in (Hofmanová, 2016; Hofmanová *et al.*, 2016).

## Genotype likelihoods estimations

### Post mortem damage patterns

We used *ATLAS* (task=PMD) to infer position-specific PMD patterns as described in (Kousathanas *et al.*, 2017) from the tabulated mismatches between the raw reads and the hs37d5 reference genome. These patterns were mainly inferred independently for all whole-genome individuals and read groups. However, for neutralomes we used the *master* BAMfile to pool all read groups that came from the same sample and had similar PMD pattern (option *poolReadGroups*).

### Base quality score recalibration

We used *ATLAS* (task=recal) to recalibrate base quality scores with the method described in (Kousathanas *et al.*, 2017) using the model *qualFuncPosSpecificContext*. This reference-free approach exploits a set of known homozygous sites and is extended to additional covariates beyond the original quality score, in our case the specific position within the sequencing read and the nucleotide context. As known homozygous sites, we used 10 million sites highly conserved among mammals as reflected by high RS-Scores (also called GERP scores; (Cooper *et al.*, 2005)) calculated across the multiple sequence alignments of 88 mammals and provided by Ensembl ([http://ftp.ensembl.org/pub/release-96/compara/conservation\\_scores/88\\_mammals.gerp\\_conservation\\_score/gerp\\_conservation\\_scores.homo\\_sapiens.GRCh38.bw](http://ftp.ensembl.org/pub/release-96/compara/conservation_scores/88_mammals.gerp_conservation_score/gerp_conservation_scores.homo_sapiens.GRCh38.bw)). For single-end sequencing data, the read groups were split into two new read groups during the raw data processing, so we provided the names of these split read groups to be merged for recalibration (option *poolReadGroups*). For neutralomes, we used the *master* BAMfile to pool all read groups that were generated with the same sequencing run and lane. This increased the power when estimating recalibration parameters for all neutralome samples.

## Genotype likelihoods

We used *ATLAS* (task=GLF) to infer genotype likelihoods for all individuals at autosomal neutral capture 5Mb sites. We considered the PMD and the recalibration parameters previously estimated. This created GLF files for all our samples at the selected sites.

## Downstream quality filtering

### Downsampling experiments

For further analysis, we tested the impact of recalibration and post-mortem damage in 12 low-coverage and medium-coverage whole-genome samples. The tests consisted in downsampling the BAMfiles by probabilities ranging from 1 to 0.05, and estimating their heterozygosity in windows (*ATLAS*, task=thetaQC), either ignoring or considering PMD and recalibration parameters, respectively. For more details, see Figure S2B.

### Depth and Heterozygosity Filtering

Based on the downsampling experiments, we estimated heterozygosity once with full data and 50 times using a downsampling probability of 0.5 (*ATLAS*, task=thetaQC) for every sample. The PMD and recalibration parameters inferred from full data were used in all heterozygosity estimations so that we can assess how well the error-rates are recalibrated between the full data and downsampled versions. We calculated the log ratio between the median sampled estimate with full data and the median of the 50 downsampling median sampled estimates. For the neutralome data, we bootstrapped 100 times the genome wide heterozygosity on the capture neutral regions and took the medians for the full data and the 50 downsampling median estimates and proceeded to calculate the log ratio. A ratio  $<0.239$  and  $>-0.239$  and a depth of coverage  $>1.5x$  for whole-genome and  $>4x$  for neutralome were used as quality filters (Figure S2A) to ensure comparability among samples and increase the sensitivity of our population genomic analyses. A total of 54 out of 79 whole-genomes and 56 out of 75 neutralomes passed these filters (7 overlaps between them) with two neutralome samples being further removed as mentioned below (Kinship analysis).

## Population genetic analysis

### Kinship analysis

We used *ATLAS* (task = geneticDist) to estimate the euclidean distances between all pairs of ancient samples that passed our quality control filters, using the GLFs created during the estimation of genotype likelihoods. We then used a custom R script (<https://bitbucket.org/wegmannlab/atlas/downloads/Relatedness.R>) to apply the method of (Waples, Albrechtsen and Moltke, 2019) to transform these distances into estimates of genetic relatedness. No relatedness was detected among Danube Gorges samples, but for Dil15 and Bar15 which were filtered out for downstream analysis. See details in Figure S1D.

### Major/minor

We used *ATLAS* (task = majorMinor) to estimate the major and minor alleles (default parameters) from our sample-specific GLFs and output the genotype likelihoods for those in a vcf file, which then was converted to a Beagle format (task=VCFToBeagle) for the population genetic analysis. This was run for different sets of populations.

### PCA

We used *PCAngsd* (v0.986; (Meisner and Albrechtsen, 2018)) with default parameters (MAF $\geq$ 0.05) on different sets of populations to estimate the covariance matrix and perform Principal Component Analysis (PCA).

### Admixture analysis

We used *NGSAdmix* (Skotte, Korneliussen and Albrechtsen, 2013) with -minMaf 0.05 to infer admixture proportions for different numbers of clusters (K=2 to K=7). Each K was run 10 times with a different seed and the best K was estimated by applying the Evanno method (Evanno, Regnaut and Goudet, 2005). In addition, Entropy (v2.0; (Shastry *et al.*, 2021)) and *PCAngsd* were run as well for different Ks to estimate admixture proportions. The deviance information criterion (DIC) was used for entropy models with K=2 to K=7, lower values of DIC correspond to better model fit. For *PCAngsd*, a different eigenvector value was provided each time since the best K was empirically set to 2 based on PC loadings. The admixture proportions were then

compared among the three (Figure S3B). The results were qualitatively the same, in all cases  $K=2$  is the best fit, and only the proportions from *NGSadmix* were used for population structure.

### Inter population ancestry

We used the second model of *Entropy* (Shastry *et al.*, 2021) that takes into account the combination of ancestry states across all loci in diploid individuals. The benefit of this model is that it allows distinguishing among early generations of admixed individuals (i.e., F1, BC1) when combined with their global ancestry. We followed the user manual as described in the bitbucket repository ([https://bitbucket.org/buerklelab/mixedploidy-entropy/src/master/vignette\\_entropy.pdf](https://bitbucket.org/buerklelab/mixedploidy-entropy/src/master/vignette_entropy.pdf)) to format the input genotype likelihood data and run *Entropy* with the right options. The model was run with five chains simultaneously, where posterior distributions were estimated with 100,000 iterations, sampled every 10th iteration and with 10,000 burn-in.

### Intra-inter genetic diversity

#### Genomic regions of interest

We extracted exons and introns from the human genome annotation file ([http://ftp.ensembl.org/pub/grch37/release-104/gff3/homo\\_sapiens/Homo\\_sapiens.GRCh37.87.gff3.gz](http://ftp.ensembl.org/pub/grch37/release-104/gff3/homo_sapiens/Homo_sapiens.GRCh37.87.gff3.gz)) by using a custom R script. We used *bedtools* (v2.27.1; (Quinlan and Hall, 2010)) to merge intervals and to subtract the exons regions that were also in the introns. We combined tracks from build GRCH37 of the UCSC Genome Browser (Kent *et al.*, 2002) to exclude simple-repeats, segmental duplications, self Chains, regions with high CpG content and the strict callability mask from 1000G (1000 Genomes Project Consortium *et al.*, 2015). We ended up with ~50Mb in both regions (introns were downsampled to the same amount of exons sites). Additionally, we identified 17,737 neutral 1kb autosomal loci based on 37,574 autosomal neutral regions (Gronau *et al.*, 2011) that were lifted over from hg18 to GRCH37 (<https://genome.ucsc.edu/cgi-bin/hgLiftOver>). To update and provide an extra layer of stringency while accounting for the liftover, we used *NRE* (Arbiza, Zhong and Keinan, 2012) to mask all sites that do not fall in the 37,574 lifted loci and removed mammalian conserved noncoding elements plus 100bp each side (PhastConsElements46WayPlacental GRCH37 track; (Pollard *et al.*, 2010)). Regions with recombination rate  $<0.1$  and  $>10$  cM/Mb, nearest gene distance  $<0.01$  cM, simple repeats, BG selection coefficient  $<0.85$  and not separated at

least 50kb from each other were excluded too following (Gronau *et al.*, 2011; Veeramah *et al.*, 2018). Since the list of 37,574 loci does not include the X chromosome, we applied the filters from above and (Gronau *et al.*, 2011) on the X chromosome with slight modifications to be less stringent. We ended up with 5,505 neutral >1kb X loci (~11Mb).

### Genome-wide Heterozygosity ( $\theta$ )

We used *ATLAS* (task=theta thetaGenomeWide minDepth=2 bootstraps=100) to infer genome wide heterozygosity with 100 bootstraps on autosomal neutral sites. The nuclear capture data in fact contain 5Mb of autosomal neutral sites at high depth; however, for ancient whole-genomes, more neutral sites were necessary for increasing the sensitivity of the estimates. Hence, we provided the autosomal neutral ~18Mb sites (section “Genomic regions of interest”) for the whole-genome data and the autosomal neutral 5Mb sites for the nuclear capture data to estimate single genome-wide estimates for  $\theta$ .

### Heterozygosity ratio ( $\theta_1/\theta_2$ )

We first tested the statistical power of the heterozygosity ratio model in *ATLAS* by simulating genomic data with default parameters (task=simulate) as shown in Figure S4. It was concluded that a depth >1.5x and a window size >10Mb for both regions of interest provide good estimates. We then used *ATLAS* (task=thetaRatio) to estimate genetic diversity between exons and introns with a prior=0 for all whole-genome samples, and also between X and autosome neutral sites with a prior= $\log(3/4)$  for all female whole-genome samples. These genomic regions are above 10Mb and they were extracted as explained in section “Genomic regions of interest”.

### ROHs

We used *ATLAS* (task=call method=majorityBase) to produce haploid calls on known alleles (1240K sites; (Mathieson *et al.*, 2015)) while taking PMD and recalibration parameters into account for the whole-genome samples. We merged our calls with the 1240K reference panel using a custom script and plink (v1.9; (Chang *et al.*, 2015)) and converted them into *EIGENSTRAT* format (*convertf -p*, <https://reich.hms.harvard.edu/software/InputFileFormats>). We then used *hapROH* (v0.3a4; (Ringbauer, Novembre and Steinrücken, 2021)) with default parameters to identify runs of homozygosity (ROHs) in whole-genome modern and ancient samples. The *hapROH* output files were merged and the ROHs were binned on genetic length

ranges (2-5cM, 5-10cM and >10cM) to calculate the total length and number of ROHs for each bin.

## Phenotyping prediction

### HirisPlex analysis

We used *ATLAS* (taks=call method=MLE) to produce diploid calls on a set of 41 SNPs (Chaitanya *et al.*, 2018) while taking PMD and recalibration parameters into account for our nuclear genomic data. We then used the *HirisPlex-S* webtool (Walsh *et al.*, 2014, 2017; Chaitanya *et al.*, 2018) to predict possible pigmentation phenotypes. We therefore created a csv file by converting genotypes to allele counts for all alleles of interest needed for the prediction and uploaded it at <https://hirisplex.erasmusmc.nl/>. We obtained posterior probabilities for four phenotypes, each of them consisting of different categories that sum up to one: skin pigmentation (dark, intermediate, pale and very pale), hair pigmentation (black, brown, blond and red), eye pigmentation (brown, intermediate and blue) and hair shade (dark and light) (Figure S5). In order to reduce noise, we turned phenotypes with more than two categories into a binary form by summing up the corresponding probabilities falling in the darker (dark, intermediate, black and brown) or lighter (pale, very pale, blonde, red and blue) spectrum. We then proceeded to train a LDA model based on the summarized probabilities as input and using a set of Meso European-like and Neo Aegean-like samples as a grouping factor, excluding admixed samples and those from a different geographical context (see Figure 4).

## Supplemental Information

Document S1: Supporting Figures S1–S5 and Table S1.

Extended data tables:

Supplementary Data Table 1: Sample processing including detailed information on library preparation, read- and sample statistics, isotope- haplogroup and contamination information for sequenced libraries and ancient reference samples.

Supplementary Data Table 2: List of samples used in the interval-set and guidance set for local in-del realignment.

## Acknowledgements

This work was supported by Swiss National Science Foundation (31003A\_173062 and 310030\_200420 to DW, 31003A\_182577 to MC), Marie Skłodowska-Curie actions ITN “BEAN”. ZH was further supported by the European Research Council (856453 ERC-2019-SyG), Czech Grant Agency (GACR 21-17092X) and EMBO Long-Term Fellowship (ALTF 445-2017). CB was supported by the Fyssen Foundation (Fondation Fyssen, post-doctoral research grant).

We also thank the IBU cluster and sequencing facility of the University of Bern.

GENterprise, SAPM Munich,

## Declaration of Interests

The authors declare no competing interests.



## Figures and Tables

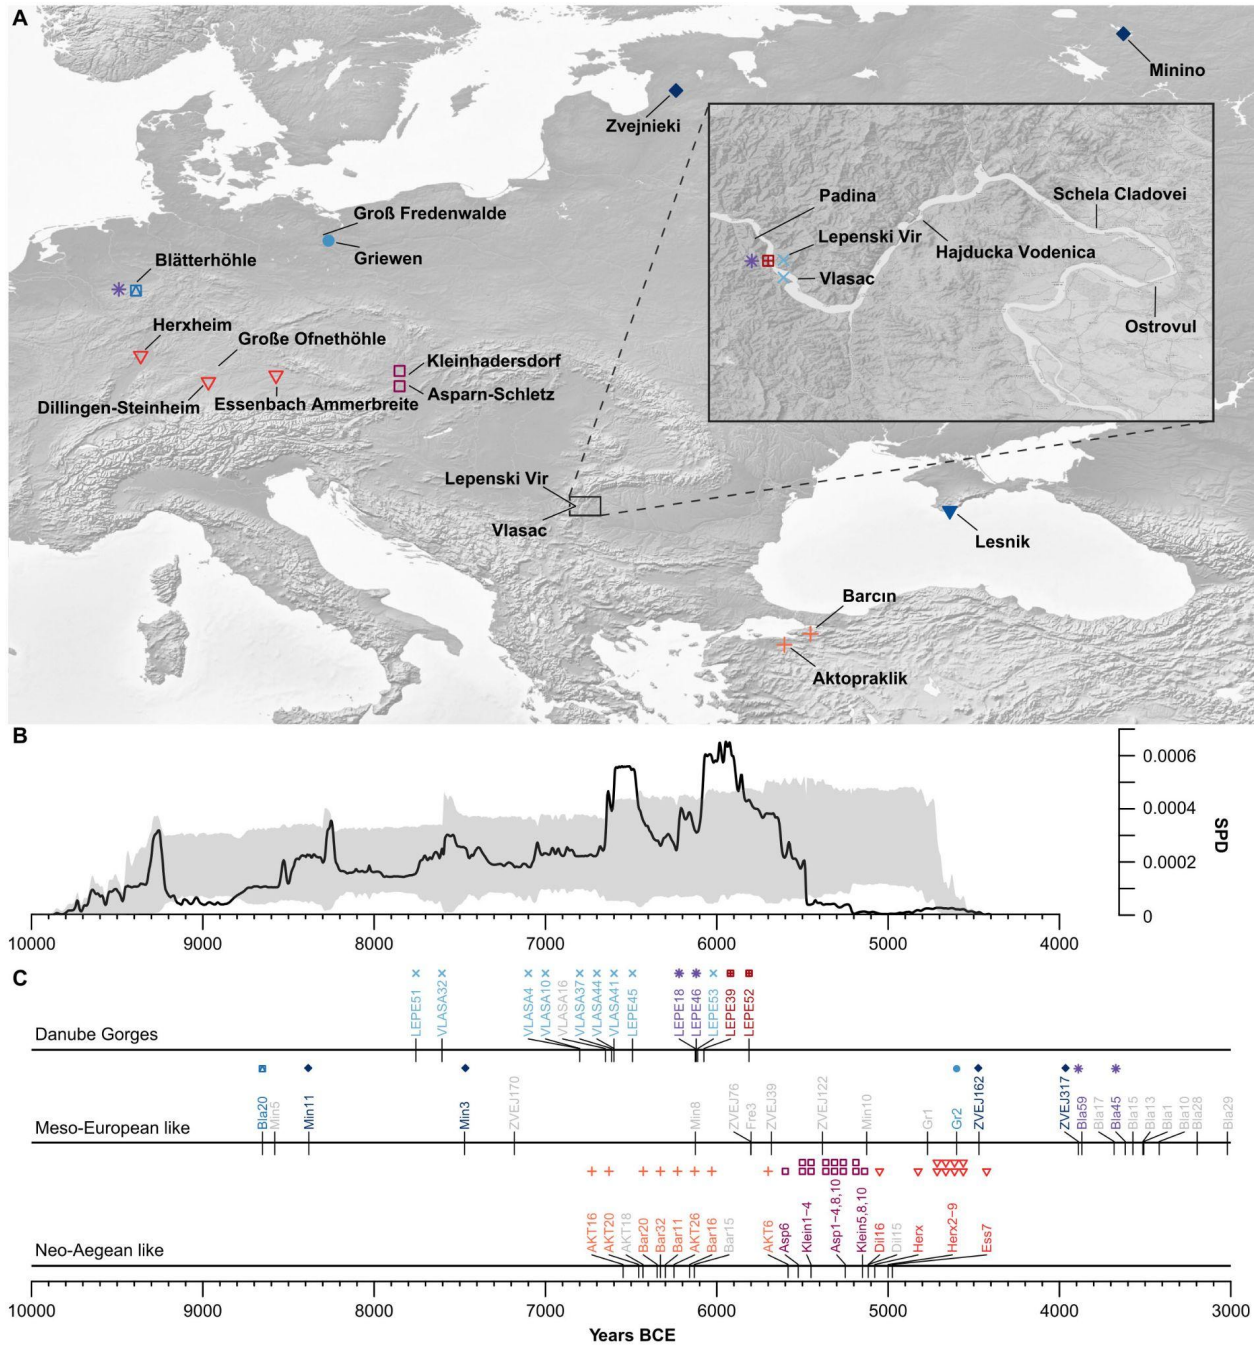

**Figure 1 - Spatial and temporal distribution of the ancient nuclear genomic samples sequenced in this study.**

**(A)** Location of archeological sites of Danube Gorges, North Aegean and Central, North and East Europe.

**(B)** Observed summed probability distribution (SPD, solid black line) of calibrated radiocarbon dates from Danube Gorges along with a simulation envelope of the fitted model (shaded gray area). Adapted after (de Beccelièvre *et al.*, 2021).

**(C)** Chronological distribution of whole-genome and nuclear capture data sequenced in this study (see details in Table 1). Both symbols and labels are shown for each directly-14C or approximately dated sample, except for the ones who were filtered out for downstream analysis (labels shown in gray) or whose dates were not available.

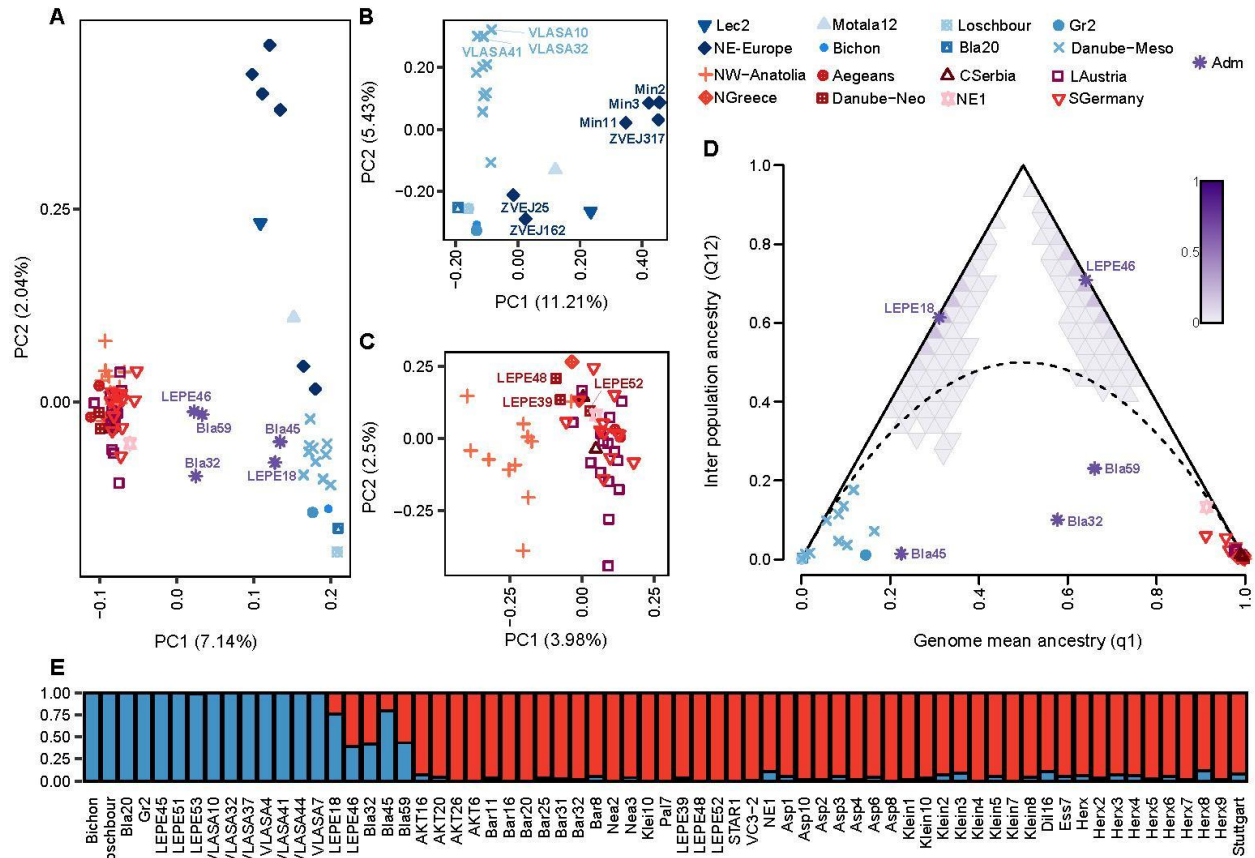

**Figure 2. PCA and Admixture of Meso European-like and Neo Aegean-like individuals.**

(A) PCA that includes Neo Aegean-like individuals in red-like colors and Meso European-like individuals in blue-like colors. Admixed individuals are shown in purple.

(B) PCA using only Meso European-like populations.

(C) PCA using only Neo Aegean-like populations.

(D) Entropy analysis with the same dataset as in (A) but excluding Lec2, Motala12 and North-Eastern European hunter-gatherers. The y axis denotes the proportion of the genome in which one gene copy comes from Neo Aegean-like ancestry and the other from Meso European-like ancestry; the position of our Lepenski Vir individuals are associated with backcross lineages. The x axis denotes the proportion for Neo Aegean-like genome ancestry estimated by Entropy. Inner triangles represent the samples of the posterior distribution and the curved dotted line is based on Hardy-Weinberg equilibrium (HWE).

(E) NGSadmix results for K=2 using the set from Entropy (D); blue represents the Meso European-like ancestry and red the Neo Aegean-like ancestry.



**Table 1 - Archaeological and genetic information of all sequencing data either produced in this study or available for the Danube Gorges.**

| Sample ID                                                                        | Site                             | Phase <sup>a</sup> | Archeological/<br>Burial ID | Age<br>(cal. BC)         | Mean<br>Depth | Genetic<br>sex | R <sub>y</sub> | MT-Haplogroup |
|----------------------------------------------------------------------------------|----------------------------------|--------------------|-----------------------------|--------------------------|---------------|----------------|----------------|---------------|
| <b>Danube Gorges whole genomes</b>                                               |                                  |                    |                             |                          |               |                |                |               |
| VLASA16*                                                                         | Vlasac                           | LM                 | VL 53                       | 6,650 ± 174              | 0.99          | XX             | 0.0012         | U5a1c         |
| VLASA37                                                                          | Vlasac                           | LM                 | VL 24                       | 6,614 ± 153              | 5.06          | XY             | 0.0829         | K1f           |
| LEPE45                                                                           | Lepenski Vir                     | TEN                | LV 91                       | 6,492 ± 96               | 4.03          | XY             | 0.0754         | U5a2d         |
| LEPE46*. <sup>#</sup>                                                            | Lepenski Vir                     | TEN                | LV 93                       | 6,120 ± 102              | 0.74          | XX             | 0.0014         | H             |
| LEPE51                                                                           | Lepenski Vir                     | EM                 | LV 68                       | 7,756 ± 184              | 3.74          | XX             | 0.0004         | U4a2          |
| LEPE53*. <sup>#</sup>                                                            | Lepenski Vir                     | TEN                | LV 27/a                     | 6,111.5 ± 104.5          | 0.91          | XX             | 0.0013         | U5b2c1        |
| <b>Danube Gorges neutralomes</b>                                                 |                                  |                    |                             |                          |               |                |                |               |
| VLASA4                                                                           | Vlasac                           | LM                 | VL 18/a                     | ~7,400-6,200             | 85.82         | XY             | 0.0815         | U5a1c         |
| VLASA10                                                                          | Vlasac                           | LM                 | VL 41                       | ~7,400-6,200             | 41.74         | XY             | 0.0978         | K1f           |
| VLASA32 <sup>#</sup>                                                             | Vlasac                           | LM                 | VL 16                       | 7,604.5 ± 136.5          | 43.08         | XY             | 0.08           | U5a2a         |
| VLASA41                                                                          | Vlasac                           | LM                 | VL 30                       | ~7,400-6,200             | 55.97         | XX             | 0.0005         | U5b2b         |
| VLASA44                                                                          | Vlasac                           | LM                 | VL 47                       | ~7,400-6,200             | 64.96         | XY             | 0.0819         | U5b2b         |
| LEPE18                                                                           | Lepenski Vir                     | TEN                | LV 27/d                     | 6,126 ± 100              | 78.71         | XY             | 0.0822         | U5a2          |
| LEPE39                                                                           | Lepenski Vir                     | TEN                | LV 82                       | 6,075 ± 125              | 23.26         | XY             | 0.0798         | T2e           |
| LEPE46 <sup>#</sup>                                                              | Lepenski Vir                     | TEN                | LV 93                       | 6,120 ± 102              | 52.09         | XX             | 0.0005         | H             |
| LEPE52 <sup>#</sup>                                                              | Lepenski Vir                     | E-MN               | LV 73                       | 5,812 ± 119              | 61.44         | XY             | 0.082          | H2a           |
| LEPE53 <sup>#</sup>                                                              | Lepenski Vir                     | TEN                | LV 27/a                     | 6,111.5 ± 104.5          | 36.39         | XX             | 0.0004         | U5b2c1        |
| <b>Danube Gorges whole genomes - published data (Marchi <i>et al.</i>, 2022)</b> |                                  |                    |                             |                          |               |                |                |               |
| VLASA7                                                                           | Vlasac                           | LM                 | VL 31                       | 6,552 ± 212              | 15.21         | XY             | 0.0754         | U5a2a         |
| VLASA32 <sup>#</sup>                                                             | Vlasac                           | LM                 | VL 16                       | 7,604.5 ± 136.5          | 12.66         | XY             | 0.0753         | U5a2a         |
| LEPE48                                                                           | Lepenski Vir                     | TEN                | LV 122                      | 5,939.5 ± 72.5           | 10.93         | XY             | 0.0755         | K1a1          |
| LEPE52 <sup>#</sup>                                                              | Lepenski Vir                     | E-MN               | LV 73                       | 5,812 ± 119              | 12.38         | XY             | 0.0751         | H3            |
| <b>non-Danube Gorges nuclear capture genomes</b>                                 |                                  |                    |                             |                          |               |                |                |               |
| Lec2                                                                             | Lesnika Cave,<br>Crimea Ai-Petri | EM                 | Lsa 031                     | -                        | 12.906        | XY             | 0.0952         | U5a1          |
| Min2                                                                             | Minino                           | M                  | Minino I, 11                | -                        | 16.212        | XX             | 0.0006         | U4            |
| Min3                                                                             | Minino                           | M                  | Minino II, III              | 7,472 ± 52               | 58.044        | XY             | 0.089          | U4a1          |
| Min5*                                                                            | Minino                           | M                  | Minino I, 3                 | 8,580 ± 160              | 3.365         | XY             | 0.077          | U4            |
| Min8*                                                                            | Minino                           | M                  | Minino I, 5                 | 6,125 ± 325              | 0.812         | XY             | 0.0826         | U4a1          |
| Min10*                                                                           | Minino                           | M                  | Minino I, 20                | 5,125 ± 525              | 3.917         | XX             | 0.0006         | U4d           |
| Min11                                                                            | Minino                           | M                  | Minino II, V                | 8,671 ± 48<br>8,092 ± 94 | 39.340        | XY             | 0.1181         | U4a1          |
| ZVEJ317                                                                          | Zvejnieki                        | M                  | ZV317                       | 3,890 ± 67               | 28.716        | XY             | 0.1415         | U4a1          |
| ZVEJ39*                                                                          | Zvejnieki                        | M                  | ZV39                        | 5,681 ± 36               | 1.707         | XY             | 0.0788         | U5a2c         |
| ZVEJ76*                                                                          | Zvejnieki                        | M                  | ZV76                        | 5,802 ± 73               | 1.164         | XX             | 0.0006         | U5a2          |
| ZVEJ122*                                                                         | Zvejnieki                        | M                  | ZV122                       | 5,383 ± 68               | 0.971         | XY             | 0.0889         | U5a2d         |
| ZVEJ162                                                                          | Zvejnieki                        | M                  | ZV162                       | 4,470 ± 72               | 17.264        | XY             | 0.1132         | U4a1          |
| ZVEJ170*                                                                         | Zvejnieki                        | M                  | ZV170                       | 7,182 ± 107              | 0.251         | XY             | 0.0793         | U5a2d         |
| Bla20                                                                            | Blätterhöhle                     | M                  | BH 04/174                   | 8,652 ± 58               | 6.558         | XX             | 0.0005         | U5a2c         |
| Fre3*                                                                            | Groß Fredenwalde                 | M                  | Ind 1                       | 5,800 ± 400              | 0.315         | XY             | 0.0762         | H2a2a         |

|                     |                     |          |                                                |                |         |    |        |          |
|---------------------|---------------------|----------|------------------------------------------------|----------------|---------|----|--------|----------|
| Gr1*                | Criewen             | M        | Criewen<br>1961:82 Grab1                       | 4,770 ± 40     | 5.104   | XY | 0.1072 | U5b2a2   |
| Gr2                 | Criewen             | M        | 1961: 82/7                                     | 4,600 ± 60     | 21.134  | XX | 0.0005 | U4b1b1   |
| GrO1*               | Große Ofnethöhle    | LM       | Ind 12, Ktg nr<br>SV 001/12<br>(2485)          | -              | 11.351  | XY | 0.0795 | U5b1d1   |
| AKT6                | Aktopraklik         | EN       | H17/50.1                                       | 5,584 ± 49     | 32.182  | XY | 0.0815 | T2       |
| AKT16#              | Aktopraklik         | EN       | D89/14.1                                       | 6,547 ± 87     | 39.813  | XX | 0.0019 | K1a3     |
| AKT18*              | Aktopraklik         | EN       | D89/17.1                                       | 6,431 ± 38     | 3.76    | XX | 0.0006 | H2a2a    |
| AKT20               | Aktopraklik         | EN       | E89/9.3                                        | 6,456 ± 37     | 20.96   | XY | 0.0775 | J2b1     |
| AKT26               | Aktopraklik         | EN       | D90/4.4                                        | ~6,500 - 6,000 | 18.77   | XX | 0.0004 | J2a      |
| Bar11               | Barcin              | EN       | M11/93                                         | ~6,600 - 6,000 | 24.359  | XY | 0.0801 | X        |
| Bar15* <sup>1</sup> | Barcin              | EN       | M10/115                                        | 6,131 ± 82     | 25.558  | XX | 0.0004 | K1a2     |
| Bar16               | Barcin              | EN       | L10/187                                        | 6,159 ± 74     | 22.579  | XX | 0.0004 | K1a1     |
| Bar20               | Barcin              | EN       | M11S/401                                       | 6,348 ± 90     | 13.561  | XX | 0.0006 | W5       |
| Bar32               | Barcin              | EN       | L11/604                                        | 6,329 ± 90     | 13.688  | XX | 0.002  | K1a2     |
| Asp1                | Asparn-Schletz      | EN (LBK) | 93/7//93/8, Nr.<br>4451/Schnitt<br>22          | 5,250 ± 250    | 21.639  | XY | 0.0945 | K1a      |
| Asp2                | Asparn-Schletz      | EN (LBK) | Ind 10, S6/<br>282                             | 5,250 ± 250    | 14.771  | XY | 0.085  | N1a1a1a2 |
| Asp3                | Asparn-Schletz      | EN (LBK) | Nr.<br>4455/Schnitt<br>22 1993/19              | 5,250 ± 250    | 33.465  | XX | 0.0018 | J1c17    |
| Asp4                | Asparn-Schletz      | EN (LBK) | 2490, Ind 7,<br>7//restl.<br>Schädel 5/02      | 5,250 ± 250    | 29.061  | XX | 0.0021 | T2b13b   |
| Asp6#               | Asparn-Schletz      | EN (LBK) | Ind 44 (646<br>Part 152,<br>Schnitt 10<br>LM70 | 5,525 ± 50     | 23.815  | XY | 0.0928 | U5a1c1   |
| Asp8                | Asparn-Schletz      | EN (LBK) | Ind 24, 374<br>S7/LM72 Grab<br>1               | 5,250 ± 250    | 76.578  | XX | 0.0019 | X2b      |
| Asp10               | Asparn-Schletz      | EN (LBK) | Ind 6                                          | 5,250 ± 250    | 48.450  | XY | 0.1047 | K1a      |
| Klein1              | Kleinhadersdorf     | EN (LBK) | 25,939                                         | ~5,950 - 5,150 | 85.4511 | XX | 0.0018 | T2b      |
| Klein2              | Kleinhadersdorf     | EN (LBK) | 25,941                                         | ~5,950 - 5,150 | 44.729  | XX | 0.0019 | H        |
| Klein3              | Kleinhadersdorf     | EN (LBK) | 25,945                                         | ~5,950 - 5,150 | 30.345  | XX | 0.002  | J1c2     |
| Klein4              | Kleinhadersdorf     | EN (LBK) | 25,926                                         | ~5,950 - 5,150 | 49.749  | XX | 0.0019 | T2b      |
| Klein5              | Kleinhadersdorf     | EN (LBK) | 25,925                                         | ~5,950 - 5,150 | 44.777  | XY | 0.0957 | N1a1a1a3 |
| Klein8              | Kleinhadersdorf     | EN (LBK) | 25,923                                         | ~5,950 - 5,150 | 41.197  | XX | 0.0006 | U5b      |
| Klein10             | Kleinhadersdorf     | EN (LBK) | 25,936                                         | ~5,950 - 5,150 | 49.393  | XX | 0.0021 | N1a1a1   |
| Dil15* <sup>1</sup> | Dillingen-Steinheim | EN (LBK) | Grab 23,<br>Befund 24                          | 5,116 ± 118    | 28.668  | XY | 0.0918 | J1c      |
| Dil16# <sup>1</sup> | Dillingen-Steinheim | EN (LBK) | Grave 24,<br>Befund 24                         | 5,116 ± 118    | 25.186  | XY | 0.0952 | J1c      |
| Ess7#               | EssenbachAmmerbreit | EN (LBK) | Grave 2                                        | 4,975 ± 75     | 12.2172 | XY | 0.0793 | U5b2c1   |
| Herx#               | Herxheim            | EN (LBK) | 281-19-6                                       | 5,078 ± 85     | 9.23    | XX | 0.0004 | K1a4a1i  |
| Herx2               | Herxheim            | EN (LBK) | 282-126-7                                      | ~5,000         | 55.87   | XY | 0.1266 | J2b1     |
| Herx3               | Herxheim            | EN (LBK) | 282-13-7                                       | ~5,000         | 16.14   | XX | 0.0006 | W1+119   |
| Herx4               | Herxheim            | EN (LBK) | 282-23-1                                       | ~5,000         | 115.12  | XY | 0.1039 | K1a      |

|        |              |          |                    |                          |         |     |        |          |
|--------|--------------|----------|--------------------|--------------------------|---------|-----|--------|----------|
| Herx5  | Herxheim     | EN (LBK) | 282-94-11          | ~5,000                   | 30.32   | XY  | 0.087  | HV+16311 |
| Herx6  | Herxheim     | EN (LBK) | 7034-12            | ~5,000                   | 36.42   | XX  | 0.0005 | U3       |
| Herx7  | Herxheim     | EN (LBK) | 282-104-4          | ~5,000                   | 34.39   | XY  | 0.0787 | K1a1a    |
| Herx8  | Herxheim     | EN (LBK) | 282-126-16         | ~5,000                   | 28.77   | XX  | 0.0009 | T2e      |
| Herx9  | Herxheim     | EN (LBK) | 282-88-2           | ~5,000                   | 57.05   | XX  | 0.0006 | K1a+150  |
| Bla1*  | Blätterhöhle | MN       | BH 04/011          | 3,508 ± 102              | 0.689   | XY  | 0.0981 | H1bm     |
| Bla10* | Blätterhöhle | MN       | BH 04/012 B        | 3,418 ± 63               | 3.528   | XY  | 0.0781 | H2a2a    |
| Bla13* | Blätterhöhle | MN       | BH 04/034          | 3,513 ± 102              | 4.549   | XX  | 0.0006 | H2a2a    |
| Bla15* | Blätterhöhle | MN       | BH 04/041          | 3,571 ± 47               | 0.509   | XY  | 0.0845 | H2a2a1   |
| Bla17* | Blätterhöhle | MN       | BH 04/032          | 3,681 ± 19               | 1.663   | XY  | 0.1036 | H1ba     |
| Bla28* | Blätterhöhle | MN       | BV 06G5d/Po. 49.2  | 3,196 ± 103              | 0.4235  | XY  | 0.0813 | J1c1     |
| Bla29* | Blätterhöhle | MN       | BH 07 14/Po 1      | 3,020 ± 61               | 1.282   | XX  | 0.0009 | H2a2a1   |
| Bla75* | Blätterhöhle | MN       | BH14<br>Qu7c/Bla75 | -                        | 0.303   | ~XY | 0.3047 | -        |
| Bla32  | Blätterhöhle | MN       | BH 04/072          | -                        | 47.839  | XX  | 0.0005 | H5       |
| Bla45  | Blätterhöhle | MN       | BH14<br>Qu7c/Bla45 | 3,616 ± 56<br>3,922 ± 60 | 32.4236 | XY  | 0.095  | U5b2b    |
| Bla59  | Blätterhöhle | MN       | BH14<br>Qu7c/Bla59 | 3,869 ± 59               | 10.879  | XY  | 0.0943 | U5b2a2   |

<sup>a</sup> M, Mesolithic; EM, Early Mesolithic; LM, Late Mesolithic; TEN, Transformation/Early Neolithic; EN, Early Neolithic; E-MN, Early-Middle Neolithic; MN, Middle Neolithic.

\* Samples were discarded for downstream analysis.

# Data for both whole genome and capture nuclear genome.

<sup>†</sup> Related samples, Bar8-Bar15; DII15-DII16.

## References

- 1000 Genomes Project Consortium *et al.* (2015) 'A global reference for human genetic variation', *Nature*, 526(7571), pp. 68–74.
- Adams, R.L. and King, S.M. (2011) *Residential Burial: A Multiregional Exploration*. Wiley.
- Alpaslan Roodenberg, S., Gerritsen, F.A. and Özbal, R. (2013) 'Neolithic burials from Barcin Höyük: The 2007-2012 excavation seasons', *Anatolica*, 39, pp. 93–111.
- Amster, G. *et al.* (2020) 'Changes in life history and population size can explain the relative neutral diversity levels on X and autosomes in extant human populations', *Proceedings of the National Academy of Sciences of the United States of America*, 117(33), pp. 20063–20069.
- Amster, G. and Sella, G. (2020) 'Life History Effects on Neutral Diversity Levels of Autosomes and Sex Chromosomes', *Genetics*, 215(4), pp. 1133–1142.
- Arbiza, L., Zhong, E. and Keinan, A. (2012) 'NRE: a tool for exploring neutral loci in the human genome', *BMC bioinformatics*, 13, p. 301.
- Arbuckle, B.S. *et al.* (2014) 'Data sharing reveals complexity in the westward spread of domestic animals across Neolithic Turkey', *PloS one*, 9(6), p. e99845.
- Bartosiewicz, L. *et al.* (2001) 'New data on the prehistoric fauna of the Iron Gates: a case study from Schela Cladovei, Romania', *From the Mesolithic to the Neolithic*, pp. 15–22.
- de Becdelièvre, C. *et al.* (2020) 'Direct insight into dietary adaptations and the individual experience of Neolithisation: comparing subsistence, provenance and ancestry of Early Neolithic humans from the Danube Gorges c. 6200–5500 cal BC', *Farmers at the Frontier: A Pan European Perspective on Neolithisation*, p. 45.
- de Becdelièvre, C. (2020) *Eco-ethology of prehistoric populations living in the Danube Gorges c. 10.000-5500 BC. Dietary strategies, feeding practices and nutritional choices over the Mesolithic and Neolithic Transformations*. Ph.D. University of Belgrade.
- de Becdelièvre, C. *et al.* (2021) 'Palaeodemography of the Foraging to Farming Transition: insights from the Danube Gorges Mesolithic-Neolithic transformations', in Degioanni, A., Estelle, H., and Naji, S. (eds) *Journey of a committed paleodemographer. Farewell to Jean-Pierre Bocquet-Appel*. coll. Préhistoire de la méditerranée, Aix-en-Provence: Presses Universitaires de Provence, pp. 7–14.
- Blagojević, T. *et al.* (2017) 'Early Neolithic population dynamics in the eastern Balkans and the Great Hungarian Plain', *Documenta Praehistorica*, 44, pp. 18–33.
- Bocquet-Appel, J.-P. and Bar-Yosef, O. (eds) (2008) *The Neolithic Demographic Transition and its Consequences*. Springer, Dordrecht.
- Bogdanović, M. (2008) *Grivac: Settlements of Proto-Starčevo and Vinča Culture*. Center for Scientific Research of Serbian Academy of Sciences and Arts.

Bollongino, R. *et al.* (2013) '2000 years of parallel societies in Stone Age Central Europe', *Science*, 342(6157), pp. 479–481.

Bonsall, C. *et al.* (1997) 'Mesolithic and early Neolithic in the Iron Gates: a palaeodietary perspective', *Journal of European Archaeology*, 5(1), pp. 50–92.

Bonsall, C. *et al.* (2000) 'Stable isotopes, radiocarbon and the Mesolithic-Neolithic transition in the Iron Gates', *Documenta Praehistorica*, 27(7), p. 119:132.

Borić, D. (2002) 'The Lepenski Vir conundrum: reinterpretation of the Mesolithic and Neolithic sequences in the Danube Gorges', *Antiquity*, 76(294), pp. 1026–1039.

Borić, D. (2009) 'Absolute Dating of Metallurgical Innovations in the Vinča Culture of the Balkans', in Kienlin, T.L. and Ben W, R. (eds) *Metals and Societies. Studies in honour of Barbara S. Ottaway*. Rudolf Habelt GMBH, Bohn, pp. 191–245.

Borić, D. (2011) 'Adaptations and transformations of the Danube Gorges foragers (c. 13,000–5500 cal. BC): an overview', in *Beginnings – New Research in the Appearance of the Neolithic between Northwest Anatolia and the Carpathian Basin. Papers of the International Workshop 8th - 9th April 2009, Istanbul. Organized by Dan Ciobotaru, Barbara Horejs und Raiko Krauß. Beginnings - new research in the appearance of the Neolithic between Northwest Anatolia and the Carpathian Basin : papers of the international workshop*, Rahden/Westf.: Verlag Marie Leidorf GmbH (Menschen – Kulturen – Traditionen: Studien aus den Forschungsclustern des Deutschen Archäologischen Instituts; ForschungsCluster 1), pp. 157–203.

Borić, D. *et al.* (2014) 'Late Mesolithic lifeways and deathways at Vlasac (Serbia)', *Journal of Field Archaeology*, 39(1), pp. 4–31.

Borić, D. (2015) 'The End of the Vinča World: Modelling the Neolithic to Copper Age Transition and the Notion of Archaeological Culture', in Hansen, S. *et al.* (eds) *Neolithic and Copper Age Between the Carpathians and the Aegean Sea: Chronologies and Technologies from the 6th to the 4th Millennium BCE. International Workshop Budapest*, Verlag Marie Leidorf (Archäologie in Eurasien ), pp. 157–217.

Borić, D. (2016) *Deathways at Lepenski Vir: Patterns in Mortuary Practice*. Serbian Archaeological Society.

Borić, D. (2021) 'The Danube Gorges Mesolithic: The first fifty years', in Borić, D., Antonović, D., and Mihailović, B. (eds) *Foraging Assemblages*. Serbian Archaeological Society, Belgrade, Republic of Serbia. The Italian Academy for Advanced Studies in America, Columbia University, New York, USA.

Borić, D., French, C. and Dimitrijević, V. (2008) 'Vlasac revisited: formation processes, stratigraphy and dating', *Documenta Praehistorica*, 35, pp. 261–287.

Borić, D. and Miracle, P. (2004) 'Mesolithic and neolithic (dis)continuities in the Danube gorges: New AMS dates from Padina and hajdučka vodenica (Serbia)', *Oxford Journal of Archaeology*, 23(4), pp. 341–371.

Borić, D. and Price, T.D. (2013) 'Strontium isotopes document greater human mobility at the



start of the Balkan Neolithic', *Proceedings of the National Academy of Sciences of the United States of America*, 110(9), pp. 3298–3303.

Borić, D. and Stefanović, S. (2004) 'Birth and death: infant burials from Vlasac and Lepenski Vir', *Antiquity*, 78(301), pp. 526–546.

Boroneanț, V. (1999) 'The Mesolithic Habitation Complexes in the Balkans and the Danube Basin', *Living Past*, 1. Available at: <http://www.cimec.ro/Arheologie/livingpast/nr1/boroneant/art.htm>.

Boroneanț, V. (2011) 'A Suggested Chronology for the Iron Gates Mesolithic', *Buletinul Muzeului Județean Teleorman*, (3), pp. 21–39.

Boulestin, B. *et al.* (2009) 'Mass cannibalism in the Linear Pottery Culture at Herxheim (Palatinate, Germany)', *Antiquity*, 83(322), pp. 968–982.

Boulestin, B. (2015) 'Cannibalism in the linear pottery culture: The human remains from Herxheim', *Cannibalism in the Linear Pottery Culture*, pp. 1–152.

Boulestin, B. and Coupey, A.-S. (2015) *Cannibalism in the linear pottery culture: The human remains from herxheim*. Oxford, England: Archaeopress Archaeology.

Bramanti, B. *et al.* (2009) 'Genetic discontinuity between local hunter-gatherers and central Europe's first farmers', *Science*, 326(5949), pp. 137–140.

Brami, M.N. (2017) *The Diffusion of Neolithic Practices from Anatolia to Europe: A Contextual Study of Residential Construction, 8,500-5,500 BC Cal*. BAR Publishing.

Brink-Kloke, H. (1990) 'Das linienbandkeramische Gräberfeld von Essenbach-Ammerbreite, Ldkr. Landshut, Niederbayern', *Germania*, 68(2), pp. 427–481.

Broushaki, F. *et al.* (2016) 'Early Neolithic genomes from the eastern Fertile Crescent', *Science*, 353(6298), pp. 499–503.

Budd, C. *et al.* (2013) 'Stable isotope analysis of Neolithic and Chalcolithic populations from Aktopraklık, northern Anatolia', *Journal of Archaeological Science*, pp. 860–867. doi:10.1016/j.jas.2012.09.011.

Chaitanya, L. *et al.* (2018) 'The HIRISplex-S system for eye, hair and skin colour prediction from DNA: Introduction and forensic developmental validation', *Forensic science international. Genetics*, 35, pp. 123–135.

Chang, C.C. *et al.* (2015) 'Second-generation PLINK: rising to the challenge of larger and richer datasets', *GigaScience*, 4, p. 7.

Cooper, G.M. *et al.* (2005) 'Distribution and intensity of constraint in mammalian genomic sequence', *Genome research*, 15(7), pp. 901–913.

Cristiani, E. *et al.* (2016) 'Dental calculus reveals Mesolithic foragers in the Balkans consumed domesticated plant foods', *Proceedings of the National Academy of Sciences of the United States of America*, 113(37), pp. 10298–10303.

DePristo, M.A. *et al.* (2011) 'A framework for variation discovery and genotyping using next-generation DNA sequencing data', *Nature genetics*, 43(5), pp. 491–498.

Dimitrijević, V. (2014) 'The provenance and use of fossil scaphopod shells at the Late Neolithic/Eneolithic site Vinča – Belo Brdo, Serbia', in Szabó, K. *et al.* (eds) *Archaeomalacology: Shells in the Archaeological Record*. Archaeopress Publishers of British Archaeological Reports (BAR International Series 2666).

Dimitrijević, V., Živaljević, I. and Stefanović, S. (2016) 'Becoming sedentary? The seasonality of food resource exploitation in the Mesolithic-Neolithic Danube Gorges', *Documenta Praehistorica*, pp. 103–122. doi:10.4312/dp.43.4.

Eriksson, G., Lõugas, L. and Zagorska, I. (2003) 'Stone Age hunter–fisher–gatherers at Zvejnieki, northern Latvia: Radiocarbon, stable isotope and archaeozoology data', *Before Farming: The Archaeology and Anthropology of Hunter-Gatherers*, pp. 1–25.

Evanno, G., Regnaut, S. and Goudet, J. (2005) 'Detecting the number of clusters of individuals using the software STRUCTURE: a simulation study', *Molecular ecology*, 14(8), pp. 2611–2620.

Feldman, M. *et al.* (2019) 'Late Pleistocene human genome suggests a local origin for the first farmers of central Anatolia', *Nature communications*, 10(1), p. 1218.

Fernández-López de Pablo, J. *et al.* (2019) 'Palaeodemographic modelling supports a population bottleneck during the Pleistocene-Holocene transition in Iberia', *Nature communications*, 10(1), p. 1872.

Filipović, D. and Obradović, Đ. (2013) 'Archaeobotany at Neolithic sites in Serbia: a critical overview of the methods and results', *Bioarheologija na Balkanu: bilans i perspektive*, pp. 25–55.

Fu, Q. *et al.* (2014) 'Genome sequence of a 45,000-year-old modern human from western Siberia', *Nature*, 514(7523), pp. 445–449.

Fu, Q. *et al.* (2016) 'The genetic history of Ice Age Europe', *Nature*, 534(7606), pp. 200–205.

Furtwängler, A. *et al.* (2018) 'Ratio of mitochondrial to nuclear DNA affects contamination estimates in ancient DNA analysis', *Scientific reports*, 8(1), p. 14075.

Gamba, C. *et al.* (2014) 'Genome flux and stasis in a five millennium transect of European prehistory', *Nature communications*, 5, p. 5257.

Gamble, C. *et al.* (2004) 'Climate change and evolving human diversity in Europe during the last glacial', *Philosophical transactions of the Royal Society of London. Series B, Biological sciences*, 359(1442), pp. 243–53; discussion 253–4.

Garašanin, M. and Radovanović, I. (2001) 'A pot in house 54 at Lepenski Vir I', *Antiquity*, pp. 118–125. doi:10.1017/s0003598x00052819.

Gazave, E. *et al.* (2013) 'Population growth inflates the per-individual number of deleterious mutations and reduces their mean effect', *Genetics*, 195(3), pp. 969–978.

Geisler, H. and Wetzel, G. (1999) 'Mittelsteinzeitliche und mittelalterliche Bestattungen vom

“Rollmannsberg” bei Criewen, Lkr : Uckermark’, in Czesla, E. and Kersting, T. (eds) *Den Bogen spannen ... Festschrift für Bernhard Gramsch*. Beier & Beran (Beiträge zur Ur- und Frühgeschichte Mitteleuropas), pp. 259–280.

Gerritsen, F.A., Özbal, R. and Thissen, L.C. (2013) ‘The earliest neolithic levels at Barcin Höyük, Northwestern Turkey’, *Anatolica*, 39, pp. 53–92.

Gnirke, A. *et al.* (2009) ‘Solution hybrid selection with ultra-long oligonucleotides for massively parallel targeted sequencing’, *Nature biotechnology*, 27(2), pp. 182–189.

González-Fortes, G. *et al.* (2017) ‘Paleogenomic Evidence for Multi-generational Mixing between Neolithic Farmers and Mesolithic Hunter-Gatherers in the Lower Danube Basin’, *Current biology: CB*, 27(12), pp. 1801–1810.e10.

Gronau, I. *et al.* (2011) ‘Bayesian inference of ancient human demography from individual genome sequences’, *Nature genetics*, 43(10), pp. 1031–1034.

Günther, T. *et al.* (2018) ‘Population genomics of Mesolithic Scandinavia: Investigating early postglacial migration routes and high-latitude adaptation’, *PLoS biology*, 16(1), p. e2003703.

Haack, F. (2016) ‘The early Neolithic ditched enclosure of Herxheim - architecture, fill formation processes and service life’, in Zeeb-Lanz, A. (ed.) *Ritualised Destruction in the Early Neolithic - The Exceptional Site of Herxheim (Palatinate, Germany)*. Speyer: Generaldirektion Kulturelles Erbe Rheinland-Pfalz (Forschungen zur Pfälzischen Archäologie 8.1), pp. 19–118.

Haak, W. *et al.* (2015) ‘Massive migration from the steppe is a source for Indo-European languages in Europe’. doi:10.1101/013433.

Hofmanová, Z. *et al.* (2016) ‘Early farmers from across Europe directly descended from Neolithic Aegeans’, *Proceedings of the National Academy of Sciences of the United States of America*, 113(25), pp. 6886–6891.

Hofmanová, Z. (2016) *Palaeogenomic and biostatistical analysis of ancient DNA data from Mesolithic and Neolithic skeletal remains*. Edited by J. Burger. PhD. Johannes Gutenberg University Mainz.

Jones, E.R. *et al.* (2015) ‘Upper Palaeolithic genomes reveal deep roots of modern Eurasians’, *Nature communications*, 6, p. 8912.

Jones, E.R. *et al.* (2017) ‘The Neolithic Transition in the Baltic Was Not Driven by Admixture with Early European Farmers’, *Current biology: CB*, 27(4), pp. 576–582.

Jovanović, J. (2017) ‘The diet and health status of the early neolithic communities of the Central Balkans (6200-5200 BC)’, *Универзитет у Београду* [Preprint]. Available at: <https://nardus.mpn.gov.rs/handle/123456789/8238>.

Jovanović, J. *et al.* (2019) ‘Last hunters–first farmers: new insight into subsistence strategies in the Central Balkans through multi-isotopic analysis’, *Archaeological and anthropological sciences*, 11(7), pp. 3279–3298.

Jovanović, J. *et al.* (2021) ‘Microbotanical evidence for the spread of cereal use during the Mesolithic-Neolithic transition in the Southeastern Europe (Danube Gorges): Data from dental

calculus analysis', *Journal of archaeological science*, 125, p. 105288.

Ju, D. and Mathieson, I. (2021) 'The evolution of skin pigmentation-associated variation in West Eurasia', *Proceedings of the National Academy of Sciences of the United States of America*, 118(1). doi:10.1073/pnas.2009227118.

Karul, N. and Avcı, M.B. (2011) 'Neolithic Communities in the Eastern Marmara Region: Aktopraklık C', *Anatolica*, 37, pp. 1–15.

Karul, N. and Avcı, M.B. (2013) 'Aktopraklık', in Özdoğan, M., Başgelen, N., and Kuniholm, P. (eds) *The Neolithic in Turkey: New Excavations and New Research. Northwestern Turkey and Istanbul*. İstanbul: Arkeoloji ve Sanat Yayınları, pp. 45–68.

Katoh, K. *et al.* (2002) 'MAFFT: a novel method for rapid multiple sequence alignment based on fast Fourier transform', *Nucleic acids research*, 30(14), pp. 3059–3066.

Kent, W.J. *et al.* (2002) 'The Human Genome Browser at UCSC', *Genome Research*, pp. 996–1006. doi:10.1101/gr.229102.

Kircher, M., Sawyer, S. and Meyer, M. (2012) 'Double indexing overcomes inaccuracies in multiplex sequencing on the Illumina platform', *Nucleic acids research*, 40(1), p. e3.

Kılınç, G.M. *et al.* (2016) 'The Demographic Development of the First Farmers in Anatolia', *Current biology: CB*, 26(19), pp. 2659–2666.

Korneliussen, T.S., Albrechtsen, A. and Nielsen, R. (2014) 'ANGSD: Analysis of Next Generation Sequencing Data', *BMC bioinformatics*, 15, p. 356.

Koster, J. and Rahmann, S. (2012) 'Snakemake--a scalable bioinformatics workflow engine', *Bioinformatics*, pp. 2520–2522. doi:10.1093/bioinformatics/bts480.

Kotula, A., Piezonka, H. and Terberger, T. (2020) 'The Mesolithic Cemetery of Groß Fredenwalde (NE Germany) and its Cultural Affiliations', *Lietuvos Archeologija*, 46, pp. 65–84.

Kousathanas, A. *et al.* (2017) 'Inferring Heterozygosity from Ancient and Low Coverage Genomes', *Genetics*, 205(1), pp. 317–332.

Larsson, L. *et al.* (2017) 'New Aspects of the Mesolithic-Neolithic Cemeteries and Settlement at Zvejnieki, Northern Latvia', *Acta Archaeologica*, 88(1), pp. 57–93.

Lazăr, C. *et al.* (2008) 'The Eneolithic Cemetery from Sultana-Malu Roșu (Călărași county, Romania)', *Studii de Preistorie*, 5, pp. 131–152.

Lazaridis, I. *et al.* (2014) 'Ancient human genomes suggest three ancestral populations for present-day Europeans', *Nature*, 513(7518), pp. 409–413.

Li, H. *et al.* (2009) 'The Sequence Alignment/Map format and SAMtools', *Bioinformatics*, 25(16), pp. 2078–2079.

Li, H. (2013) 'Aligning sequence reads, clone sequences and assembly contigs with BWA-MEM', *arXiv:1303.3997v2*. Broad Institute of Harvard and MIT. Available at: <https://arxiv.org/abs/1303.3997>.

Link, V. *et al.* (2017) 'ATLAS: Analysis Tools for Low-depth and Ancient Samples', *bioRxiv*. doi:10.1101/105346.

Lipson, M. *et al.* (2017) 'Parallel palaeogenomic transects reveal complex genetic history of early European farmers', *Nature*, 551(7680), pp. 368–372.

Lüning, J. (2000) *Steinzeitliche Bauern in Deutschland: die Landwirtschaft im Neolithikum*. R. Habelt.

Macintosh, A.A., Pinhasi, R. and Stock, J.T. (2016) 'Early Life Conditions and Physiological Stress following the Transition to Farming in Central/Southeast Europe: Skeletal Growth Impairment and 6000 Years of Gradual Recovery', *PloS one*, 11(2), p. e0148468.

Mallick, S. *et al.* (2016) 'The Simons Genome Diversity Project: 300 genomes from 142 diverse populations', *Nature*, 538(7624), pp. 201–206.

Marchi, N. *et al.* (2022) 'The genomic origins of the world's first farmers', *Cell* [Preprint]. doi:10.1016/j.cell.2022.04.008.

Mateiciucová, I. (2015) 'Silices', in Neugebauer-Maresch, C. and Lenneis, E. (eds) *Das Linearbandkeramische Gräberfeld von Kleinhadersdorf*. Verlag der Österreichischen Akademie der Wissenschaften (Mitteilungen der Prähistorischen Kommission), pp. 111–122.

Mathieson, I. *et al.* (2015) 'Genome-wide patterns of selection in 230 ancient Eurasians', *Nature*, 528(7583), pp. 499–503.

Mathieson, I. *et al.* (2018) 'The genomic history of southeastern Europe', *Nature*, 555(7695), pp. 197–203.

Meisner, J. and Albrechtsen, A. (2018) 'Inferring Population Structure and Admixture Proportions in Low-Depth NGS Data', *Genetics*, 210(2), pp. 719–731.

Meyer, M. and Kircher, M. (2010) 'Illumina sequencing library preparation for highly multiplexed target capture and sequencing', *Cold Spring Harbor protocols*, 2010(6), p. db.prot5448.

Mitnik, A. *et al.* (2018) 'The genetic prehistory of the Baltic Sea region', *Nature communications*, 9(1), p. 442.

Nägele, K. *et al.* (2020) 'Genomic insights into the early peopling of the Caribbean', *Science*, 369(6502), pp. 456–460.

Nehlich, O. *et al.* (2010) 'Sulphur isotope evidence for freshwater fish consumption: a case study from the Danube Gorges, SE Europe', *Journal of archaeological science*, 37(5), pp. 1131–1139.

Neugebauer-Maresch, C. and Lenneis, E. (2015) *Das Linearbandkeramische Gräberfeld von Kleinhadersdorf. Mitteilungen der Prähistorischen Kommission 82*. Wien: Verlag der Österreichischen Akademie der Wissenschaften.

Nieszery, N. (1995) *Linearbandkeramische Gräberfelder in Bayern*. Rahden, Germany: VML Vlg Marie Leidorf (Internationale Archäologie).

Olalde, I. *et al.* (2014) 'Derived immune and ancestral pigmentation alleles in a 7,000-year-old Mesolithic European', *Nature*, 507(7491), pp. 225–228.

Olalde, I. *et al.* (2015) 'A Common Genetic Origin for Early Farmers from Mediterranean Cardial and Central European LBK Cultures', *Molecular biology and evolution*, 32(12), pp. 3132–3142.

Oross, K. and Bánffy, E. (2009) 'Three successive waves of Neolithisation: LBK development in Transdanubia', *Documenta Praehistorica*, 36(0), pp. 175–189.

Orschiedt, J. (1998) 'Ergebnisse einer neuen Untersuchung der spätmesolithischen Kopfbestattungen aus Süddeutschland', in Conard, N.J. and Kind, C.-J. (eds) *Aktuelle Forschungen zum Mesolithikum – Current Mesolithic Research*. Mo Vince Verlag (Urgeschichtliche Materialhefte), pp. 147–160.

Orschiedt, J. *et al.* (2012) 'The Neolithic and Mesolithic cave site "Blätterhöhle" in Westphalia (D)', *Notae Praehistoricae*, 32, pp. 73–88.

Orschiedt, J. and Haidle, M.N. (2012) 'Violence against the living, violence against the dead on the human remains from Herxheim, Germany. Evidence of a crisis and mass cannibalism?', *Sticks, Stones, and Broken Bones*, pp. 121–138.  
doi:10.1093/acprof:osobl/9780199573066.003.0007.

Özdoğan, M. (2011) 'Archaeological Evidence on the Westward Expansion of Farming Communities from Eastern Anatolia to the Aegean and the Balkans', *Current anthropology*, 52(S4), pp. S415–S430.

Pechtl, J. (2015) 'Zeit und Umwelt. Ein Forschungsprojekt zur ersten bäuerlichen Kultur in Bayerisch-Schwaben', *Denkmalpflege Informationen*, 161, pp. 14–17.

Pollard, K.S. *et al.* (2010) 'Detection of nonneutral substitution rates on mammalian phylogenies', *Genome research*, 20(1), pp. 110–121.

Pool, J.E. and Nielsen, R. (2007) 'Population size changes reshape genomic patterns of diversity', *Evolution; international journal of organic evolution*, 61(12), pp. 3001–3006.

Porčić, M. *et al.* (2021) 'The Neolithic Demographic Transition in the Central Balkans: population dynamics reconstruction based on new radiocarbon evidence', *Philosophical transactions of the Royal Society of London. Series B, Biological sciences*, 376(1816), p. 20190712.

Porčić, M., Blagojević, T. and Stefanović, S. (2016) 'Demography of the Early Neolithic Population in Central Balkans: Population Dynamics Reconstruction Using Summed Radiocarbon Probability Distributions', *PloS one*, 11(8), p. e0160832.

Posth, C. *et al.* (2016) 'Pleistocene Mitochondrial Genomes Suggest a Single Major Dispersal of Non-Africans and a Late Glacial Population Turnover in Europe', *Current biology: CB*, 26(6), pp. 827–833.

Quinlan, A.R. and Hall, I.M. (2010) 'BEDTools: a flexible suite of utilities for comparing genomic features', *Bioinformatics*, 26(6), pp. 841–842.

Rasmussen, M. *et al.* (2011) 'An Aboriginal Australian genome reveals separate human dispersals into Asia', *Science*, 334(6052), pp. 94–98.

Renaud, G. *et al.* (2019) 'Joint Estimates of Heterozygosity and Runs of Homozygosity for Modern and Ancient Samples', *Genetics*, 212(3), pp. 587–614.

Ridush, B. (2009) 'Bear caves', *Ukraine. Slovenský Kras Acta Carsologica Slovaca*, 47, pp. 67–84.

Ringbauer, H., Novembre, J. and Steinrücken, M. (2021) 'Parental relatedness through time revealed by runs of homozygosity in ancient DNA', *Nature communications*, 12(1), p. 5425.

Roksandić, M. (1999) *Transition from Mesolithic to Neolithic in the Iron Gates gorge: Physical anthropology perspective*. PhD. Simon Fraser University. Available at: <https://www.academia.edu/download/4546963/RoksandicPhD.pdf>.

Roodenberg, A., Gerritsen, F.A. and Özbal, R. (2013) 'Neolithic Burials from Barcın Höyük: The 2007-2012 Excavation Seasons', *Anatolica*, 39, pp. 93–111.

Scheu, A. *et al.* (2015) 'The genetic prehistory of domesticated cattle from their origin to the spread across Europe', *BMC genetics*, 16, p. 54.

Schulting, R.J. and Fibiger, L. (2012) *Sticks, Stones, and Broken Bones: Neolithic Violence in a European Perspective*. OUP Oxford.

Schulz, A. (2016) *Paläo- und Populationsgenetik von Jäger-Sammler-Fischern und Ackerbauern in Nordzentraleuropa und angrenzenden Regionen*. PhD. Johannes Gutenberg-Universität Mainz. doi:10.25358/openscience-2832.

Shastry, V. *et al.* (2021) 'Model-based genotype and ancestry estimation for potential hybrids with mixed-ploidy', *Molecular Ecology Resources*, pp. 1434–1451. doi:10.1111/1755-0998.13330.

Shennan, S. (2018) *The First Farmers of Europe: An Evolutionary Perspective*. Cambridge University Press.

Sikora, M. *et al.* (2017) 'Ancient genomes show social and reproductive behavior of early Upper Paleolithic foragers', *Science*, 358(6363), pp. 659–662.

Skoglund, P. *et al.* (2013) 'Accurate sex identification of ancient human remains using DNA shotgun sequencing', *Journal of Archaeological Science*, pp. 4477–4482. doi:10.1016/j.jas.2013.07.004.

Skoglund, P. *et al.* (2014) 'Genomic diversity and admixture differs for Stone-Age Scandinavian foragers and farmers', *Science*, 344(6185), pp. 747–750.

Skotte, L., Korneliussen, T.S. and Albrechtsen, A. (2013) 'Estimating individual admixture proportions from next generation sequencing data', *Genetics*, 195(3), pp. 693–702.

Songül Alpaslan-Roodenberg, M. and Roodenberg, J. (2020) 'In the light of new data: The population of the first farming communities in the eastern Marmara region', *Praehistorische Zeitschrift*, 95(1), pp. 48–77.

Srejović, D. (1969) *Lepenski Vir: Nova praistorijska kultura u Podunavlju*. SKZ Beograd.

Stefanović, S. and Borić, D. (2008) 'New-born infant burials underneath house floors at Lepenski Vir: in pursuit of contextual meanings', *The Iron Gates in Prehistory: New Perspectives*. Oxford: Archaeopress, pp. 131–169.

Stojanovski, D. *et al.* (2020) 'Living off the land: Terrestrial-based diet and dairying in the farming communities of the Neolithic Balkans', *PloS one*, 15(8), p. e0237608.

Street, M. *et al.* (2001) 'Final Paleolithic and Mesolithic Research in Reunified Germany', *Journal of World Prehistory*, 15(4), pp. 365–453.

Stutz, L.N., Larsson, L. and Zagorska, I. (2013) 'The persistent presence of the dead: recent excavations at the hunter-gatherer cemetery at Zvejnieki (Latvia)', *Antiquity*, 87(338), pp. 1016–1029.

Talalay, L.E. (2004) 'Heady business: skulls, heads and decapitation in Neolithic Anatolia and Greece', *Journal of Mediterranean Archaeology*, 17(2), pp. 139–163.

Tasić, N. *et al.* (2015) 'The end of the affair: formal chronological modelling for the top of the Neolithic tell of Vinča-Belo Brdo', *Antiquity*, 89(347), pp. 1064–1082.

Terberger, T. *et al.* (2015) 'Standing upright to all eternity—The Mesolithic burial site at Groß Fredenwalde, Brandenburg (NE Germany): Aufrecht in die Ewigkeit – Der mesolithische Bestattungsplatz von Groß Fredenwalde, Brandenburg (Nordostdeutschland)', *Quartär*, 62, pp. 133–153.

Terberger, T. *et al.* (2018) 'Step by step – The neolithisation of Northern Central Europe in the light of stable isotope analyses', *Journal of Archaeological Science*, pp. 66–86.  
doi:10.1016/j.jas.2018.08.004.

Teschler-Nicola, M. (2012) 'The Early Neolithic site Asparn/Schletz (Lower Austria)', in Schulting, R.J. and Fibiger, L. (eds) *Sticks, Stones, and Broken Bones: Neolithic Violence in a European Perspective*. Oxford: Oxford University Press, pp. 101–120.

Tiefenböck, B. and Teschler-Nicola, M. (2015) 'Teil II: Anthropologie', in Neugebauer-Maresch, C. and Lenneis, E. (eds) *Das Linearbandkeramische Gräberfeld von Kleinhadersdorf. Mitteilungen der Prähistorischen Kommission 82*. Wien: Verlag der Österreichischen Akademie der Wissenschaften, pp. 297–392.

Turck, R. (2019) 'Where did the dead from Herxheim originate? Isotope analyses of human individuals from the find concentrations in the ditches', in Zeeb-Lanz, A. (ed.) *Ritualised Destruction in the Early Neolithic – the Exceptional Site of Herxheim (Palatinate, Germany) Vol. 2*. Speyer: Generaldirektion Kulturelles Erbe, Direktion Landesarchäologie (Forschungen zur Pfälzischen Archäologie), pp. 313–421.

Veeramah, K.R. *et al.* (2018) 'Population genomic analysis of elongated skulls reveals extensive female-biased immigration in Early Medieval Bavaria', *Proceedings of the National Academy of Sciences of the United States of America*, 115(13), pp. 3494–3499.

Walde, T.S. *im et al.* (1986) 'Köln Radiocarbon Dates III', *Radiocarbon*, 28(1), pp. 134–140.

Walsh, S. *et al.* (2014) 'Developmental validation of the HlrisPlex system: DNA-based eye and



hair colour prediction for forensic and anthropological usage', *Forensic science international. Genetics*, 9, pp. 150–161.

Walsh, S. *et al.* (2017) 'Global skin colour prediction from DNA', *Human genetics*, 136(7), pp. 847–863.

Waples, R.K., Albrechtsen, A. and Moltke, I. (2019) 'Allele frequency-free inference of close familial relationships from genotypes or low-depth sequencing data', *Molecular ecology*, 28(1), pp. 35–48.

Weissensteiner, H. *et al.* (2016) 'HaploGrep 2: mitochondrial haplogroup classification in the era of high-throughput sequencing', *Nucleic acids research*, 44(W1), pp. W58–63.

Whittle, A. *et al.* (2002) 'In the beginning : new radiocarbon dates for the Early Neolithic in northern Serbia and south-east Hungary', *Antaeus.*, 25, pp. 63–118.

Wild, E.M. *et al.* (2004) 'Neolithic Massacres: Local Skirmishes or General Warfare in Europe?', *Radiocarbon*, 46(1), pp. 377–385.

Windl, H.J. (1999) 'Makabres Ende einer Kultur?', *Archäologie in Deutschland*, 1, pp. 54–57.

Windl, H.J. (2009) 'Zur Stratigraphie der bandkeramischen Grabenwerke von Asparn an der Zaya-Schletz', in Zeeb-Lanz, A. (ed.) *Krisen – Kulturwandel – Kontinuitäten. Zum Ende der Bandkeramik in Mitteleuropa. Beiträge der internationalen Tagung in Herxheim bei Landau (Pfalz) vom 14.-17.06.2007*. Rahden: Verlag Marie Leidorf, pp. 191–196.

Wood, R.E. *et al.* (2013) 'Freshwater Radiocarbon Reservoir Effects at the Burial Ground of Minino, Northwest Russia', *Radiocarbon*, 55(1), pp. 163–177.

Zeeb-Lanz, A. (ed.) (2016) *Ritualised Destruction in the Early Neolithic – the Exceptional Site of Herxheim (Palatinate, Germany) Vol. 1*. Speyer: Generaldirektion Kulturelles Erbe, Direktion Landesarchäologie (Forschungen zur Pfälzischen Archäologie).

Zeeb-Lanz, A. (ed.) (2019) *Ritualised Destruction in the Early Neolithic – the Exceptional Site of Herxheim (Palatinate, Germany) Vol. 2*. Speyer: Generaldirektion Kulturelles Erbe, Direktion Landesarchäologie (Forschungen zur Pfälzischen Archäologie).

## Document S1

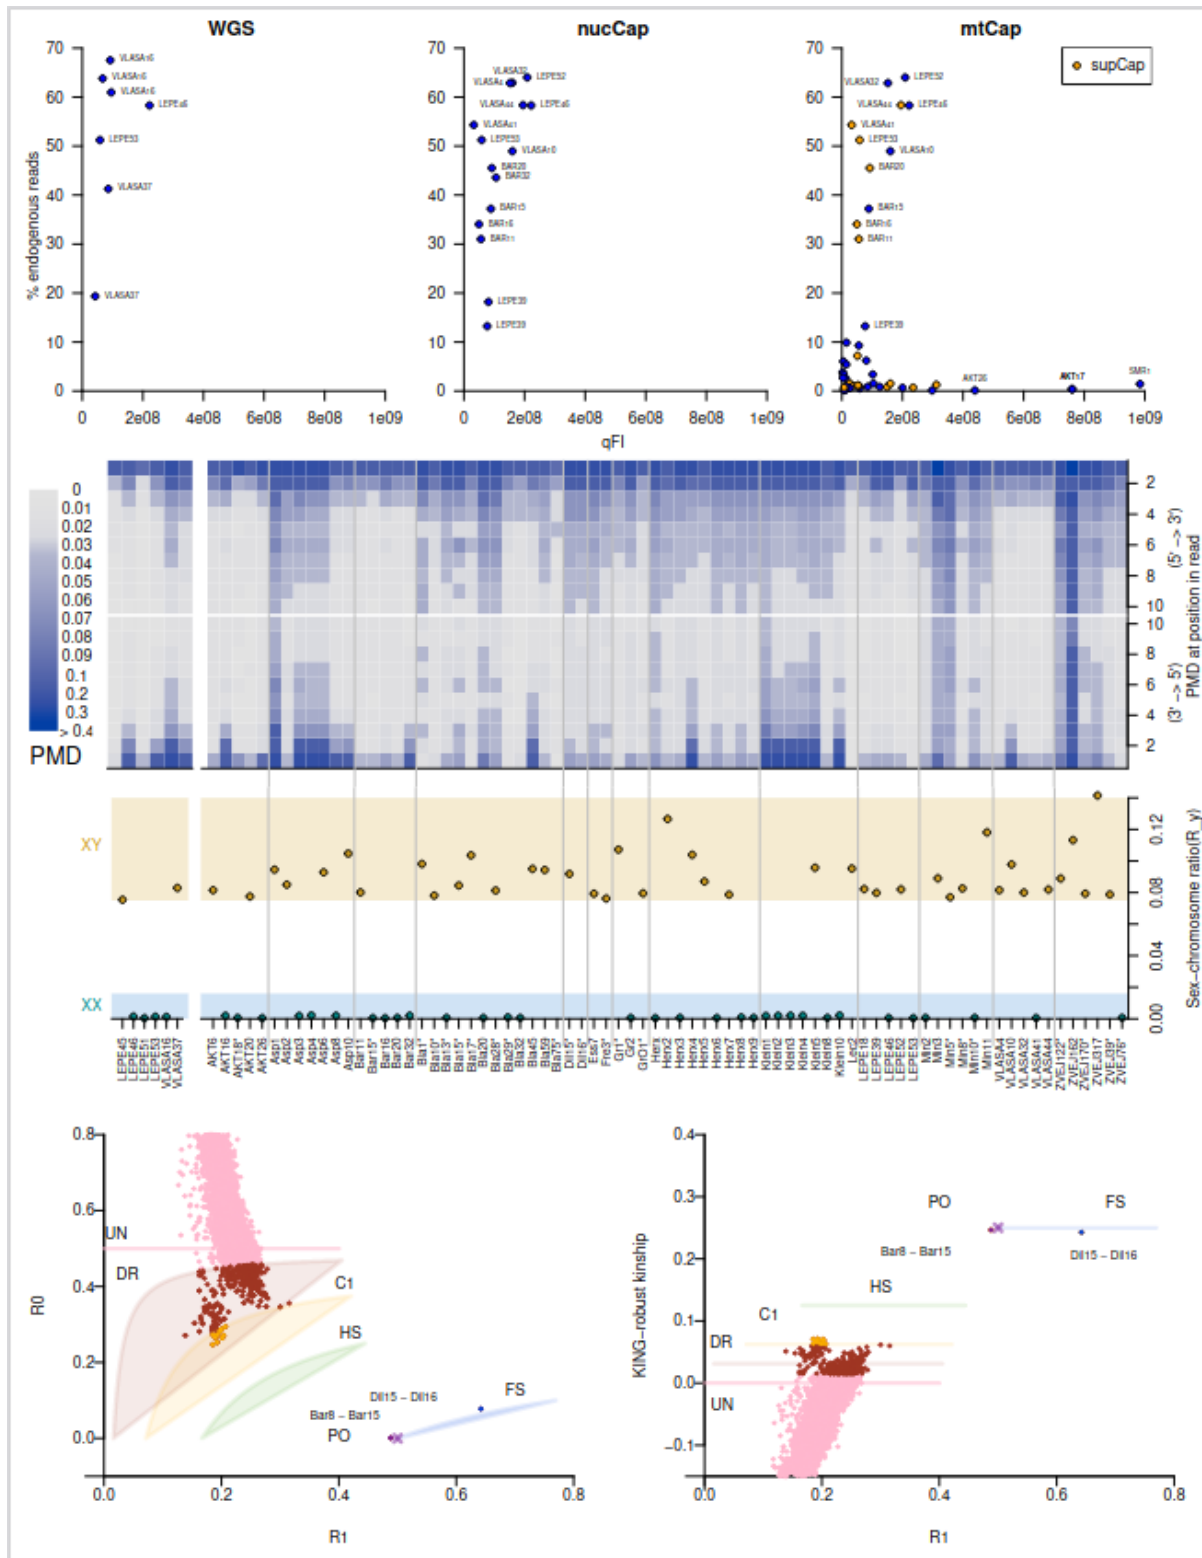

**Figure S1. Quality assessment, sex and relatedness of the genomic samples**

(A) Results from shallow MiSeq-screen of Libraries. The number of molecules in the fill-in product, measured with quantitative real-time PCR (qFI) and the percentage of reads aligning to the human reference (% endogenous). Colors and panels according to

the strategy chosen. SupCap stands for mitochondrial capture on the supernatant of nuclear capture experiment, containing unhybridized DNA.

**(B)** Post-mortem damage estimates for the first and last 10 bp of the reads. All samples show expected damage patterns

**(C)** Fraction of Y- to (X+Y)-chromosomal reads. Up from a ratio above 0.075 (orange), an individual is considered to have a XY genotype, while a ratio below 0.016 (green) is considered to arise from a XX genotype. (Skoglund 2013).

**(D)** Relatedness between the samples that passed quality filters. PO: parent-offspring, FS: full-siblings, HS: half-siblings/avuncular/grandparent-grandchild, C1: first cousin, UR: unrelated, DR: distantly related. All samples are not more than distantly related except for Bar8 and Bar15 that are PO, and Dil15 and Dil16 that are FS. Bar15 and Dil15 were additionally filtered out.

**Related to STAR Methods, Library preparation and Target enrichment, Ancient DNA Authenticity, Molecular Sex Determination and Kinship analysis.**

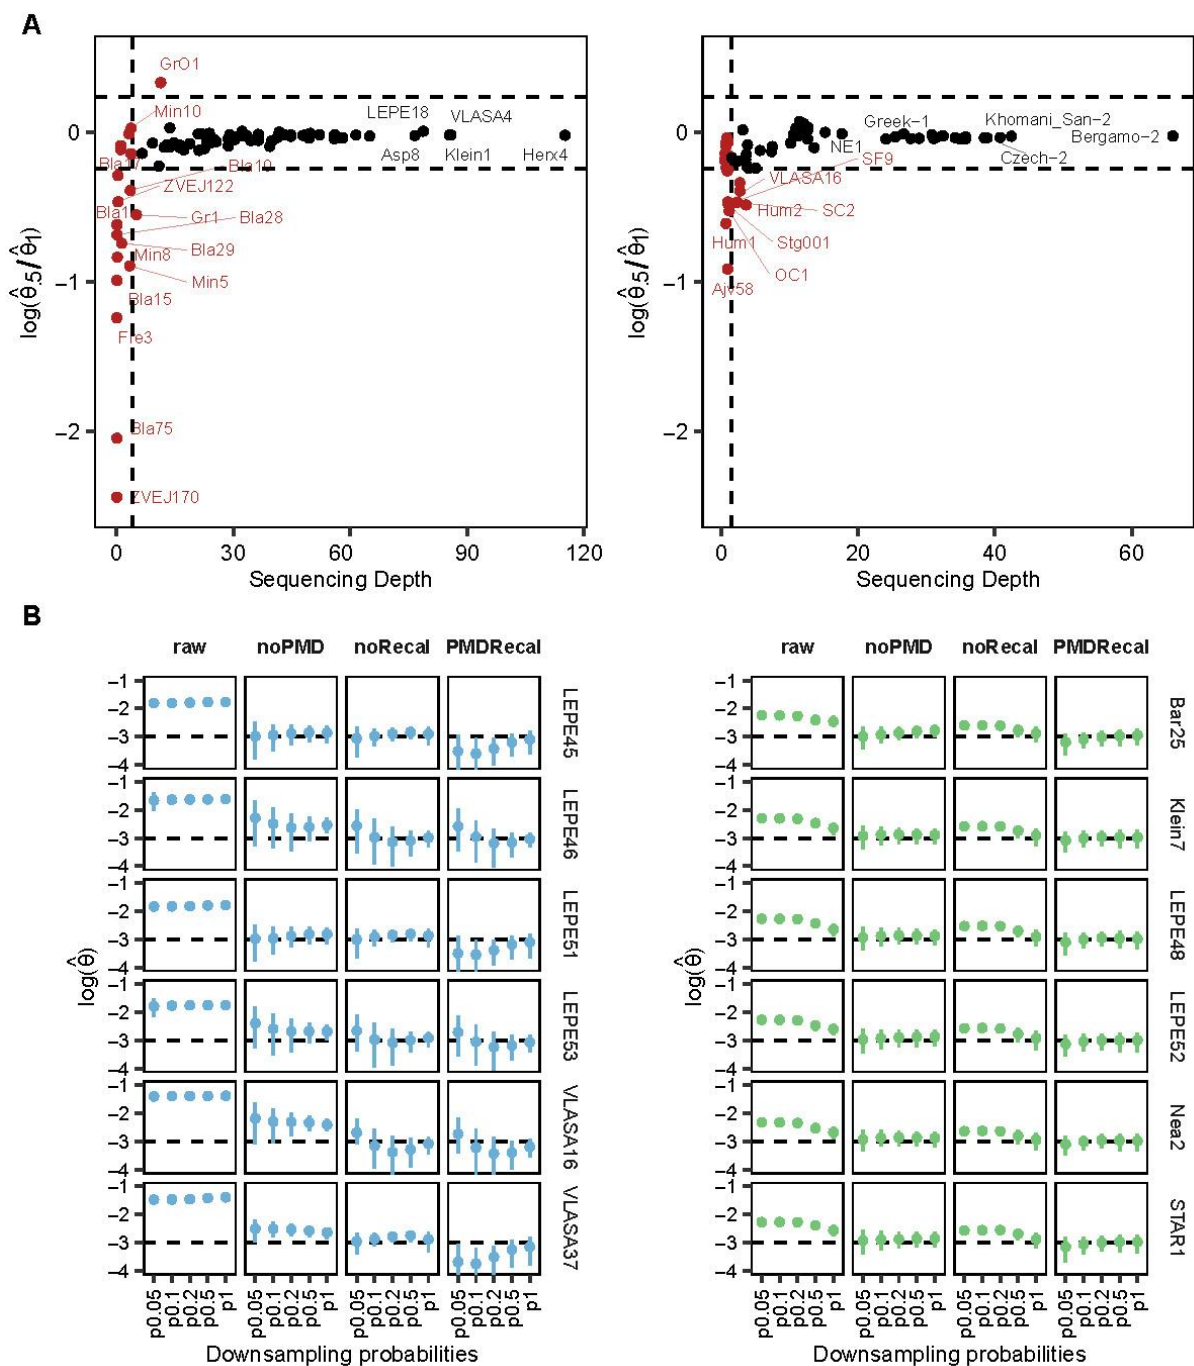

**Figure S2. Downsampling analysis and quality filtering for comparability among samples**

**(A)** log ratio between the median  $\theta$  (heterozygosity) sampled estimates using all data and the median  $\theta$  sampled estimates with data downsampled 50%. Additional quality filters were applied on all samples (left for capture, right for whole-genomes) based on the log ratio and sequencing depth ( $>1.5x$  and  $>4x$  for whole-genome and capture, respectively); both denoted as horizontal and vertical dotted lines. Samples coloured in red were discarded for downstream analysis.

**(B)**  $\theta$  downsampling experiments in low (1-4x, left) and medium-coverage ( $\sim 10x$ , right) samples from 100% to 5% data. Four different tests were done. Raw, the  $\theta$  window estimates were calculated without taking into account post-mortem damage (PMD) and recalibration of base quality scores; noPMD, just recalibration parameters were considered; noRecal, only PMD parameters were used; PMDRcal, both PMD and recalibration estimates were taken into account, this is the final way all our data were processed.

**Related to STAR Methods, Depth and Heterozygosity Filtering, and Downsampling experiments.**

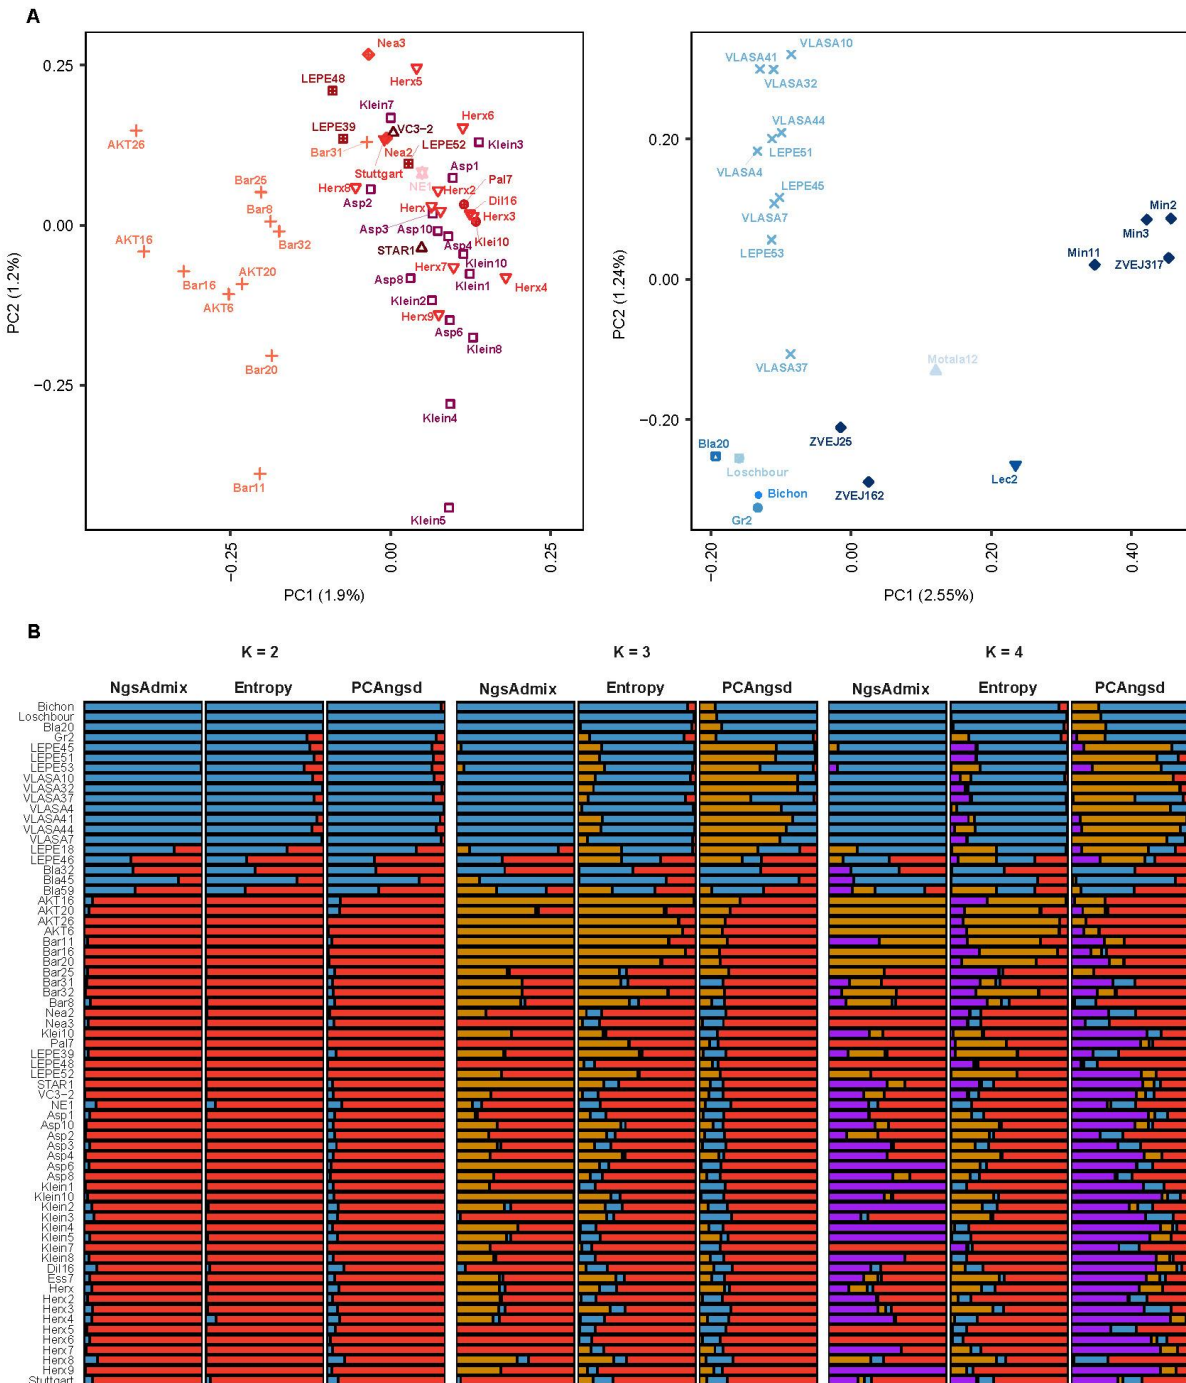

**Figure S3. Genetic structure in the ancient samples**

**(A)** PCAs for Neo Aegean-like and Meso European-like with their respective sample labels.

**(B)** Admixture results from K=2 to K=4 using different softwares. The Evanno method and the deviance information criterion (DIC) were used for NgsAdmix and Entropy, respectively, to estimate the best K (PCAngsd estimates the best K on the fly). In all cases K=2 is the best. The set of samples used here excludes Lec2, Motala12 and North-Eastern Europeans compared to PCA.

**Related to Figure 2 and STAR Methods, PCA and Admixture analysis.**

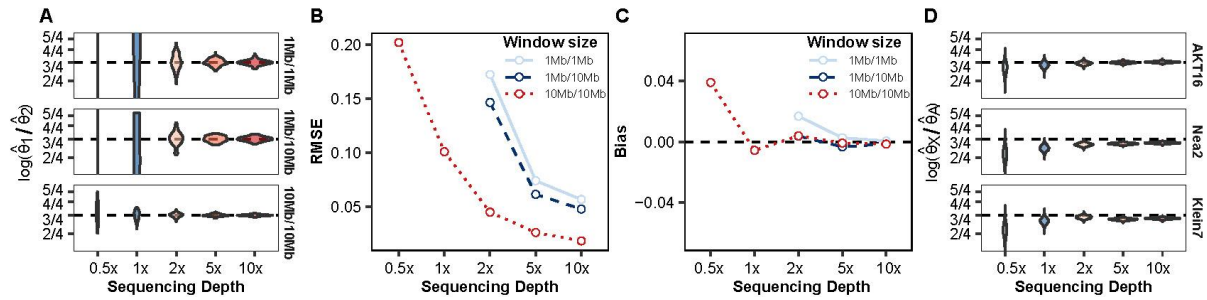

**Figure S4. Theta ratio power analysis.**

**(A)** 100 BAMfiles were simulated with a sequencing depth of 10x and two chromosomes of same or different length (1Mb, 10Mb). The first chromosome was simulated with  $\theta = 0.75 \cdot 0.001$  and the second with  $\theta = 0.001$  to mimic the expected ratio between the X chromosome and an autosome in humans. All BAMfiles were downsampled from 10x to 0.5x. The distribution of posterior medians obtained with ATLAS task=thetaRatio; at 0.5x most medians were out the plotted range.

**(B)** Root mean squared error (RSME) between the posterior median and true value  $\log(\frac{3}{4})$ ; at 0.5x most medians were out the plotted range. Below 2x, the RMSE becomes much larger than the scale of the plot.

**(C)** The difference between the median of each 100 posterior medians per sequencing depth and window size and the true value  $\log(\frac{3}{4})$ ; below 2x and with less than 10Mb per region the Bias becomes more negative than the scale of the plot.

**(D)** Three ancient samples with medium coverage depth were chosen and downsampled from 10x to 0.5x to estimate the theta ratio between neutral sites in X chromosome and autosomes. Expected values are in dashed lines.

**Related to Figure 3 and STAR Methods, Heterozygosity ratio.**

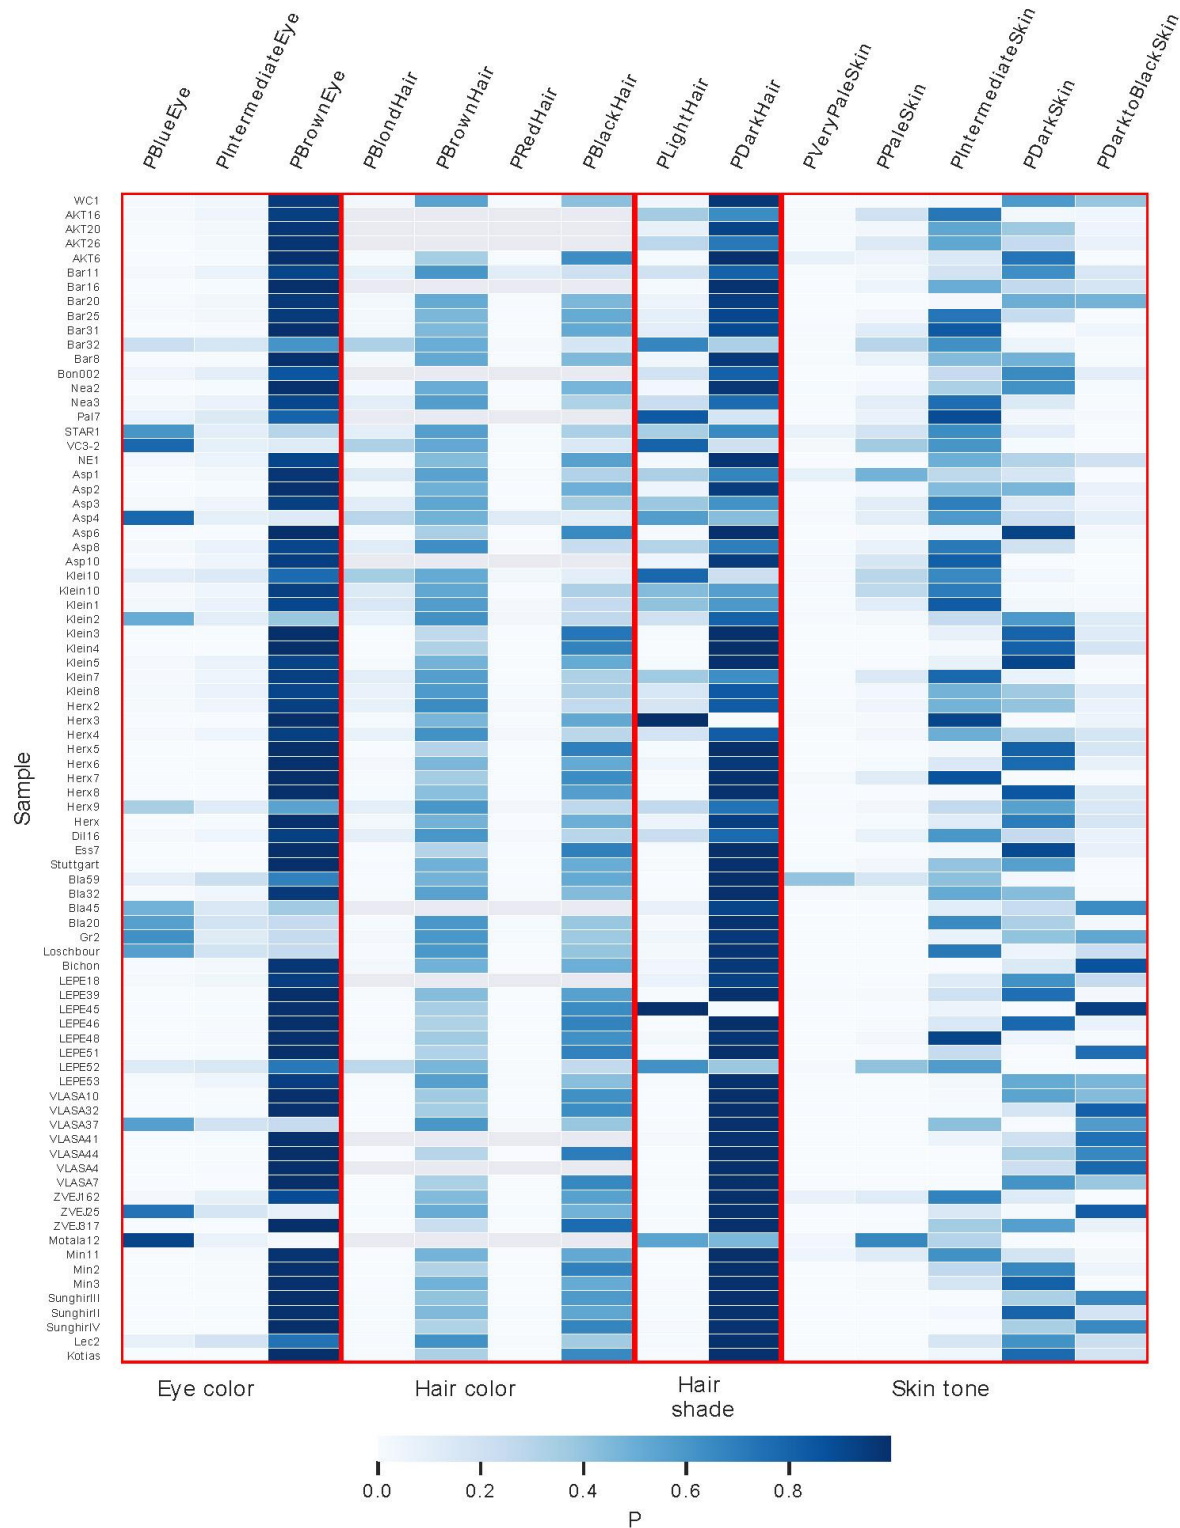

**Figure S5. HirisPlex analysis.**

Probabilities for eye, hair and skin pigmentation phenotypes estimated using the HirisPlex-S webtool for newly sequenced capture and whole genomes and previously published individuals. In case an individual has capture and whole-genome sequences available, the analysis with capture data was just shown. Some SNPs associated with hair colour genotypes could not be called properly for some individuals.

**Related to Figure 4 and STAR Methods, HirisPlex analysis**



**Table S1. Reference whole-genome samples.**

| Sample ID         | Site                | Phase            | Archeological/<br>BurialID           | Age (cal. BC)   | Mean<br>Depth | Sex | Publication                   |
|-------------------|---------------------|------------------|--------------------------------------|-----------------|---------------|-----|-------------------------------|
| SunghirII         | Sunghir             | MUP              | 2, SII                               | 32,234 ± 1049   | 3.86          | XY  | (Sikora et al. 2017)          |
| SunghirIII        | Sunghir             | MUP              | 2, SIII                              | 32,092 ± 1061   | 10.16         | XY  | (Sikora et al. 2017)          |
| SunghirIV         | Sunghir             | MUP              | 2, SIV                               | 31,992 ± 493    | 3.68          | XY  | (Sikora et al. 2017)          |
| SunghirI*         | Sunghir             | MUP              | 1, SI                                | 30,822 ± 1052   | 1.05          | XY  | (Sikora et al. 2017)          |
| Kotias            | Kotias Klde         | LM               | Layer A2                             | 7,712 ± 183     | 11.93         | XY  | (Jones et al. 2015)           |
| ZVEJ25            | Zvejnieki           | LM (Narva)       | 93                                   | 5,738 ± 102.5   | 3.16          | XY  | (Jones et al. 2017)           |
| ZVEJ32*           | Zvejnieki           | MM (Kunda)       | 313                                  | 6,358 ± 109     | 0.98          | XX  | (Jones et al. 2017)           |
| Hum1*             | Hummervikholmen     | M Scand.         | -                                    | 7,363.5 ± 88.5  | 0.7           | XX  | (Günther et al. 2018)         |
| Hum2*             | Hummervikholmen     | M Scand.         | -                                    | 7,363.5 ± 88.5  | 3.64          | XY  | (Günther et al. 2018)         |
| SF9*              | Stora Förvar        | M Scand.         | G/Layer 9                            | 7,144 ± 156     | 1.03          | XX  | (Günther et al. 2018)         |
| Stg001*           | Steigen             | M Scand.         | -                                    | 3,857 ± 93      | 1.11          | XY  | (Günther et al. 2018)         |
| Motala12          | Östergötland        | M Scand.         | -                                    | 5,938.5 ± 422.5 | 1.92          | XX  | (Lazaridis et al. 2014)       |
| Satsurbia*        | Satsurbia           | UP               | Area B, Y5                           | 11,256 ± 124    | 1.17          | XY  | (Jones et al. 2015)           |
| Bichon            | Grotte du Bichon    | UP               | Bichon                               | 11,665 ± 105    | 7.47          | XY  | (Jones et al. 2015)           |
| Loschbour         | Heffingen           | LM               | LBK380                               | 6,105 ± 115     | 12.05         | XY  | (Lazaridis et al. 2014)       |
| LaBrana*          | La Braña-Arintero   | M                | La Braña 1                           | 5,815 ± 125     | 2.71          | XY  | (Olalde et al. 2014)          |
| Canes1-Meso*      | Canes               | M                | I-A                                  | 5,115 ± 130     | 0.49          | XX  | (González-Fortes et al. 2017) |
| Chan-Meso*        | Chan do Lindeiro    | M                | Elba                                 | 7,131 ± 124     | 0.95          | XX  | (González-Fortes et al. 2017) |
| OC1-Meso*         | Ostrovul Corbului   | M                | 24                                   | 6,704 ± 269     | 1.2           | XY  | (González-Fortes et al. 2017) |
| SC2-Meso*         | Schela Cladovei     | M                | M96/3                                | -               | 2.341         | XY  | (González-Fortes et al. 2017) |
| VLASA7            | Vlasac              | LM               | VL 31                                | 6,552 ± 212     | 15.21         | XY  | (Marchi et al. 2022)          |
| VLASA32#          | Vlasac              | LM               | VL 16                                | 7,604.5 ± 136.5 | 12.65         | XY  | (Marchi et al. 2022)          |
| WC1               | Wezmeh Cave         | EN               | n-10                                 | 7,268.5 ± 186.5 | 12.72         | XY  | (Broushaki et al. 2016)       |
| AH1*              | Tepe Abdul Hosein   | EN               | 13030                                | -               | 1.1           | XX  | (Broushaki et al. 2016)       |
| AH2*              | Tepe Abdul Hosein   | EN               | 19001                                | 7,980.5 ± 224.5 | 0.6           | XY  | (Broushaki et al. 2016)       |
| AH4*              | Tepe Abdul Hosein   | EN               | 10035                                | 7,979.5 ± 224.5 | 0.82          | XX  | (Broushaki et al. 2016)       |
| Bon002            | Boncuklu            | N                | ZHB; Grave 9                         | 8,128 ± 151     | 5.67          | XX  | (Kilinc et al. 2016)          |
| AKT16#            | Aktopraklik         | EN               | 89 D 14.1                            | 6,547.5 ± 87.5  | 10.85         | XX  | (Marchi et al. 2022)          |
| Bar31             | Barcin              | EN               | L11W-546                             | 6,328 ± 91      | 3.56          | XY  | (Hofmanová et al. 2016)       |
| Bar8 <sup>1</sup> | Barcin              | EN               | M10/106                              | 6,121 ± 91      | 7.38          | XX  | (Hofmanová et al. 2016)       |
| Bar25             | Barcin              | EN               | BH 43347,<br>M10, 455 (lot.<br>1856) | 6,294.5 ± 89.5  | 12.66         | XY  | (Marchi et al. 2022)          |
| Nea3              | Nea Nikomedeia      | EN               | T XII                                | 6,183.5 ± 143.5 | 11.57         | XX  | (Marchi et al. 2022)          |
| Nea2              | Nea Nikomedeia      | EN               | #7                                   | 6,098 ± 75      | 12.51         | XX  | (Marchi et al. 2022)          |
| Rev5*             | Revenia             | EN               | Rev5, burial 2                       | 6,351 ± 87      | 1.14          | XX  | (Hofmanová et al. 2016)       |
| Klei10            | Kleitos             | FN               | grave 9                              | 4,116 ± 118     | 2.49          | XY  | (Hofmanová et al. 2016)       |
| Pal7              | Paliambela          | LN               | Pal7                                 | 4,401 ± 51      | 1.56          | XX  | (Hofmanová et al. 2016)       |
| LEPE52#           | Lepenski-Vir        | E-MN             | LV 73                                | 5,812 ± 119     | 12.38         | XY  | (Marchi et al. 2022)          |
| LEPE48            | Lepenski-Vir        | TEN              | LV 122                               | 5,939.5 ± 72.5  | 10.93         | XY  | (Marchi et al. 2022)          |
| STAR1             | Grad-Starčevo       | EN<br>(Starčevo) | grave 1                              | 5,532.5 ± 56.5  | 10.56         | XX  | (Marchi et al. 2022)          |
| VC3-2             | Vinča-Belo Brdo     | EN<br>(Starčevo) | grave V - ND                         | 5,495.5 ± 69.5  | 11.23         | XY  | (Marchi et al. 2022)          |
| KO1*              | TiszaszólósDomaháza | EN (Körös)       | 4                                    | 5,715 ± 65      | 0.73          | XY  | (Gamba et al. 2014)           |
| NE1               | Polgár-Ferenci-hát  | MN (ALP)         | 325 V                                | 5,190 ± 120     | 17.66         | XX  | (Gamba et al. 2014)           |

|                       |                      |              |                                             |                 |       |    |                               |
|-----------------------|----------------------|--------------|---------------------------------------------|-----------------|-------|----|-------------------------------|
| Klein7                | Kleinhadersdorf      | EN (LBK)     | Grave 56<br>(25.937)                        | 4,977 ± 181     | 11.3  | XX | (Marchi et al. 2022)          |
| Asp6 <sup>#</sup>     | Asparn-Schletz       | EN (LBK)     | Ind 44, 646 Part<br>152, Schnitt 10<br>LM70 | 5,524.5 ± 50.5  | 12.12 | XY | (Marchi et al. 2022)          |
| Dil16 <sup>#,1</sup>  | Dillingen-Steinheim  | EN (LBK)     | Grave 24,<br>Befund 24                      | 5,116.5 ± 118.5 | 10.61 | XY | (Marchi et al. 2022)          |
| Ess7 <sup>#</sup>     | Essenbach Ammerbreit | EN (LBK)     | Grave 2                                     | 4,975 ± 75      | 12.34 | XY | (Marchi et al. 2022)          |
| Herx <sup>#</sup>     | Herxheim             | EN (LBK)     | 281-19-6                                    | 5,078 ± 85      | 11.47 | XX | (Marchi et al. 2022)          |
| Stuttgart             | Stuttgart Mühlhausen | EN (LBK)     | grave (I-78,<br>area-1)                     | 4,900 ± 150     | 13.59 | XX | (Lazaridis et al. 2014)       |
| CB13 <sup>*</sup>     | Cova Bonica          | EN (Cardial) | CB13-HH34-<br>IV 2 -2407                    | 5,415 ± 55      | 0.84  | XX | (Olalde et al. 2015)          |
| ZVEJ27 <sup>*</sup>   | Zvejnieki            | M/EN         | 121                                         | 5,077 ± 225     | 0.7   | XY | (Jones et al. 2017)           |
| ZVEJ31 <sup>*</sup>   | Zvejnieki            | MN (Ware)    | 221                                         | 4,014 ± 214.5   | 1.01  | XX | (Jones et al. 2017)           |
| GB1-Eneo <sup>*</sup> | Gura Baciului        | Eneolithic   | M1                                          | 3,377 ± 77      | 2.73  | XX | (González-Fortes et al. 2017) |
| Ajv58 <sup>*</sup>    | Ajvide               | N (PWC)      | -                                           | 2,750 ± 150     | 0.96  | XY | (Skoglund et al. 2014)        |
| KhSan-1               | South Africa         | Modern       | -                                           | -               | 38.45 | XX | (Mallick et al. 2016)         |
| KhSan-2               | South Africa         | Modern       | -                                           | -               | 42.42 | XX | (Mallick et al. 2016)         |
| Mbuti-2               | Congo                | Modern       | -                                           | -               | 30.81 | XX | (Mallick et al. 2016)         |
| Mandenka-2            | Senegal              | Modern       | -                                           | -               | 32.44 | XX | (Mallick et al. 2016)         |
| BaKenya-2             | Kenya                | Modern       | -                                           | -               | 31.34 | XX | (Mallick et al. 2016)         |
| Turkish-2             | Turkey               | Modern       | -                                           | -               | 31.05 | XX | (Mallick et al. 2016)         |
| Georgian-1            | Georgia              | Modern       | -                                           | -               | 35.32 | XY | (Mallick et al. 2016)         |
| Greek-1               | Greece               | Modern       | -                                           | -               | 25.45 | XY | (Mallick et al. 2016)         |
| Bulgarian-1           | Bulgaria             | Modern       | -                                           | -               | 34.83 | XY | (Mallick et al. 2016)         |
| Albanian-1            | Albania              | Modern       | -                                           | -               | 24.09 | XX | (Mallick et al. 2016)         |
| Hungarian-1           | Hungary              | Modern       | -                                           | -               | 27.7  | XX | (Mallick et al. 2016)         |
| Czech-2               | Czech Republic       | Modern       | -                                           | -               | 40.77 | XY | (Mallick et al. 2016)         |
| Polish-1              | Poland               | Modern       | -                                           | -               | 38.84 | XY | (Mallick et al. 2016)         |
| Saami-1               | Finland              | Modern       | -                                           | -               | 35.71 | XX | (Mallick et al. 2016)         |
| Finnish-1             | Finland              | Modern       | -                                           | -               | 32.18 | XX | (Mallick et al. 2016)         |
| English-1             | England              | Modern       | -                                           | -               | 34.21 | XY | (Mallick et al. 2016)         |
| French-2              | France               | Modern       | -                                           | -               | 26.68 | XX | (Mallick et al. 2016)         |
| Spanish-2             | Spain                | Modern       | -                                           | -               | 35.72 | XX | (Mallick et al. 2016)         |
| Bergamo-2             | Italy                | Modern       | -                                           | -               | 65.99 | XX | (Mallick et al. 2016)         |
| Sardinian-2           | Italy                | Modern       | -                                           | -               | 28.96 | XX | (Mallick et al. 2016)         |

<sup>a</sup> UP, Upper Palaeolithic; MUP, Mid Upper Palaeolithic; M, Mesolithic; EM, Early Mesolithic; MM, Middle Mesolithic; LM, Late Mesolithic; TEN, Transformational/Early Neolithic; N, Neolithic; EN, Early Neolithic; E-MN, Early-Middle Neolithic; MN, Middle Neolithic; LN, Late Neolithic; FN, Final Neolithic

<sup>\*</sup> Samples were discarded for downstream analysis.

<sup>#</sup> Data for both whole genome and capture nuclear genome.

<sup>1</sup> Related samples, Bar8-Bar15; Dil15-Dil16.

## Supplemental References

- Broushaki, Farnaz, Mark G. Thomas, Vivian Link, Saïoa López, Lucy van Dorp, Karola Kirsanow, Zuzana Hofmanová, et al. 2016. "Early Neolithic Genomes from the Eastern Fertile Crescent." *Science* 353 (6298): 499–503.
- Gamba, Cristina, Eppie R. Jones, Matthew D. Teasdale, Russell L. McLaughlin, Gloria Gonzalez-Fortes, Valeria Mattiangeli, László Domboróczki, et al. 2014. "Genome Flux and Stasis in a Five Millennium Transect of European Prehistory." *Nature Communications* 5 (October): 5257.
- González-Fortes, Gloria, Eppie R. Jones, Emma Lightfoot, Clive Bonsall, Catalin Lazar, Aurora Grandal-d'Anglade, María Dolores Garralda, et al. 2017. "Paleogenomic Evidence for Multi-Generational Mixing between Neolithic Farmers and Mesolithic Hunter-Gatherers in the Lower Danube Basin." *Current Biology: CB* 27 (12): 1801–10.e10.
- Günther, Torsten, Helena Malmström, Emma M. Svensson, Ayça Omrak, Federico Sánchez-Quinto, Gülşah M. Kılınc, Maja Krzewińska, et al. 2018. "Population Genomics of Mesolithic Scandinavia: Investigating Early Postglacial Migration Routes and High-Latitude Adaptation." *PLoS Biology* 16 (1): e2003703.
- Hofmanová, Zuzana, Susanne Kreutzer, Garrett Hellenthal, Christian Sell, Yoan Diekmann, David Díez-Del-Molino, Lucy van Dorp, et al. 2016. "Early Farmers from across Europe Directly Descended from Neolithic Aegeans." *Proceedings of the National Academy of Sciences of the United States of America* 113 (25): 6886–91.
- Jones, Eppie R., Gloria Gonzalez-Fortes, Sarah Connell, Veronika Siska, Anders Eriksson, Rui Martiniano, Russell L. McLaughlin, et al. 2015. "Upper Palaeolithic Genomes Reveal Deep Roots of Modern Eurasians." *Nature Communications* 6 (November): 8912.
- Jones, Eppie R., Gunita Zarina, Vyacheslav Moiseyev, Emma Lightfoot, Philip R. Nigst, Andrea Manica, Ron Pinhasi, and Daniel G. Bradley. 2017. "The Neolithic Transition in the Baltic Was Not Driven by Admixture with Early European Farmers." *Current Biology: CB* 27 (4): 576–82.
- Kılınc, Gülşah Merve, Ayça Omrak, Füsün Özer, Torsten Günther, Ali Metin Büyükkarakaya, Erhan Bıçakçı, Douglas Baird, et al. 2016. "The Demographic Development of the First Farmers in Anatolia." *Current Biology: CB* 26 (19): 2659–66.
- Lazaridis, Iosif, Nick Patterson, Alissa Mitnik, Gabriel Renaud, Swapan Mallick, Karola Kirsanow, Peter H. Sudmant, et al. 2014. "Ancient Human Genomes Suggest Three Ancestral Populations for Present-Day Europeans." *Nature* 513 (7518): 409–13.
- Mallick, Swapan, Heng Li, Mark Lipson, Iain Mathieson, Melissa Gymrek, Fernando Racimo, Mengyao Zhao, et al. 2016. "The Simons Genome Diversity Project: 300 Genomes from 142 Diverse Populations." *Nature* 538 (7624): 201–6.
- Marchi, Nina, Laura Winkelbach, Ilektra Schulz, Maxime Brami, Zuzana Hofmanová, Jens Blöcher, Carlos S. Reyna-Blanco, et al. 2022. "The Genomic Origins of the World's First Farmers." *Cell*, May. <https://doi.org/10.1016/j.cell.2022.04.008>.
- Olalde, Iñigo, Morten E. Allentoft, Federico Sánchez-Quinto, Gabriel Sanpere, Charleston W. K. Chiang, Michael DeGiorgio, Javier Prado-Martinez, et al. 2014. "Derived Immune and Ancestral Pigmentation Alleles in a 7,000-Year-Old Mesolithic European." *Nature* 507 (7491): 225–28.
- Olalde, Iñigo, Hannes Schroeder, Marcela Sandoval-Velasco, Lasse Vinner, Irene Lobón, Oscar Ramirez, Sergi Civit, et al. 2015. "A Common Genetic Origin for Early Farmers from Mediterranean Cardial and Central European LBK Cultures." *Molecular Biology and Evolution* 32 (12): 3132–42.
- Sikora, Martin, Andaine Seguin-Orlando, Vitor C. Sousa, Anders Albrechtsen, Thorfinn Korneliussen, Amy Ko, Simon Rasmussen, et al. 2017. "Ancient Genomes Show Social and Reproductive Behavior of Early Upper Paleolithic Foragers." *Science* 358 (6363): 659–62.
- Skoglund, Pontus, Helena Malmström, Ayça Omrak, Maanasa Raghavan, Cristina Valdiosera, Torsten Günther, Per Hall, et al. 2014. "Genomic Diversity and Admixture Differs for Stone-Age Scandinavian Foragers and Farmers." *Science* 344 (6185): 747–50.
